# Supplementary material for: Appraisal of healthcare students and professionals’ knowledge and intention to educate the public regarding monkeypox (Mpox)
Source: PeerJ. 2025 Apr 4;13:e19162. doi: 10.7717/peerj.19162 (PMC11974541; doi:10.7717/peerj.19162)
Supplement: Supplemental Information 2 [file peerj-13-19162-s002.xls]

## Sheet: Data
Age_group	Gender	MaritalStatus	Status	EducationLevel	Fieldofeducation	MonkeypoxhasbeenreportedinSaudiArabia	Monkeypoxisapublichealthemergencyofinternationalconcern	Monkeypoxisa	Q1	DoesMonkeypoxinfectiontransferfromdirecthumantohumancontact	Q2	DoesMonkeypoxinfectiontransferfromanimaltohuman	Q3	DoesMonkeypoxinfectiontransferbyairborne	Q4	DoesMonkeypoxinfectiontransfersexually	Q5	Canthemonkeypoxvirusbespreadthroughabloodtransfusion	Q6	ApregnantpersoncanspreadtheMonkeypoxtotheirfetusthroughtheplacen	Q7	IsfeverasymptomofMonkeypox	Q8	IsarashasymptomofMonkeypox	Q9	IsaChillsasymptomofMonkeypox	Q10	IsanExhaustionasymptomofMonkeypox	Q11	IsaMuscleachesandbackacheasymptomofMonkeypox	Q12	IsaHeadacheasymptomofMonkeypox	Q13	MonkeypoxcancauseRespiratorysymptomssuchasflu	Q14	MonkeypoxcancauseUrinarysymptoms	Q15	SwollenlymphnodesaresignsofMonkeypox	Q16	IsnauseaasymptomofMonkeypox	Q17	Monkeypoxsymptomsusuallystartwithin….ofexposuretothevirus	Q18	ForhowmanydaysdosymptomsofMonkeypoxlast	Q19	ArethererecommendedpreventionstepstoprotectpeoplefromMonkeypox	Q20	Doespastexposuretochickenpoxprovideanyprotectionagainstmonkeypox	Q21
1	1	3	1	1	2	1	0	2	0	1	1	0	0	2	0	0	0	2	0	1	1	0	0	0	0	1	1	0	0	2	0	1	1	0	0	2	0	1	1	2	0	0	0	1	1	0	0	0	0
1	0	1	1	1	0	1	1	1	1	1	1	0	0	1	1	0	0	1	1	2	0	1	1	1	1	1	1	1	1	1	1	1	1	1	1	0	0	1	1	0	0	2	0	1	1	0	0	0	0
0	0	0	0	0	0	1	1	1	1	0	0	1	1	1	1	1	1	1	1	1	1	1	1	0	0	0	0	1	1	1	1	1	1	1	1	1	1	0	0	0	0	0	0	0	0	1	1	0	0
0	0	0	0	0	0	1	1	0	0	0	0	1	1	0	0	0	0	0	0	0	0	0	0	1	1	2	0	2	0	1	1	1	1	0	0	0	0	1	1	0	0	0	0	0	0	1	1	0	0
0	0	0	1	0	0	1	0	0	0	1	1	0	0	1	1	0	0	0	0	1	1	0	0	0	0	1	1	1	1	1	1	1	1	1	1	0	0	1	1	0	0	0	0	0	0	1	1	0	0
1	1	0	1	1	0	1	1	1	1	2	0	1	1	0	0	1	1	1	1	2	0	1	1	1	1	2	0	2	0	1	1	0	0	0	0	0	0	2	0	2	0	0	0	0	0	1	1	0	0
0	0	0	1	1	5	0	1	0	0	1	1	1	1	0	0	1	1	1	1	1	1	0	0	0	0	0	0	0	0	1	1	0	0	1	1	1	1	0	0	0	0	0	0	1	1	1	1	0	0
3	1	0	1	1	3	1	1	1	1	1	1	1	1	1	1	1	1	1	1	1	1	1	1	1	1	1	1	1	1	1	1	1	1	1	1	2	0	2	0	1	1	1	1	1	1	1	1	0	0
3	0	0	0	3	4	1	1	1	1	1	1	1	1	0	0	1	1	1	1	1	1	1	1	1	1	0	0	1	1	1	1	1	1	1	1	1	1	0	0	0	0	2	0	1	1	1	1	0	0
1	1	1	1	1	0	0	1	2	0	1	1	1	1	0	0	1	1	1	1	0	0	0	0	1	1	1	1	1	1	1	1	1	1	0	0	0	0	1	1	0	0	2	0	1	1	1	1	0	0
2	1	0	0	3	3	0	1	1	1	0	0	2	0	0	0	2	0	2	0	0	0	2	0	2	0	2	0	2	0	2	0	2	0	2	0	2	0	2	0	2	0	1	1	1	1	1	1	1	1
3	1	1	1	1	1	0	1	1	1	1	1	0	0	0	0	0	0	0	0	0	0	1	1	1	1	2	0	0	0	1	1	1	1	0	0	1	1	0	0	0	0	1	1	3	0	1	1	1	1
3	1	1	0	1	1	2	2	0	0	2	0	1	1	2	0	2	0	2	0	1	1	2	0	0	0	2	0	1	1	0	0	1	1	2	0	0	0	2	0	1	1	0	0	2	0	2	0	1	1
3	1	1	1	0	1	1	1	1	1	1	1	0	0	1	1	1	1	1	1	2	0	1	1	1	1	2	0	1	1	2	0	1	1	1	1	2	0	2	0	0	0	0	0	1	1	1	1	2	0
2	0	1	0	2	3	1	1	1	1	1	1	1	1	0	0	1	1	0	0	1	1	0	0	0	0	0	0	1	1	1	1	1	1	1	1	1	1	1	1	0	0	2	0	2	0	0	0	0	0
0	1	0	0	0	1	1	1	1	1	1	1	1	1	0	0	1	1	0	0	1	1	2	0	2	0	2	0	1	1	2	0	1	1	1	1	0	0	0	0	1	1	1	1	0	0	1	1	0	0
3	0	1	1	1	1	2	1	1	1	2	0	1	1	2	0	2	0	0	0	2	0	1	1	0	0	1	1	1	1	1	1	1	1	1	1	1	1	1	1	1	1	2	0	0	0	1	1	0	0
0	1	0	0	1	0	0	0	1	1	2	0	1	1	0	0	0	0	1	1	0	0	1	1	1	1	1	1	1	1	1	1	1	1	1	1	0	0	1	1	0	0	0	0	1	1	1	1	0	0
2	1	0	1	1	1	1	1	1	1	1	1	1	1	0	0	1	1	2	0	1	1	1	1	1	1	2	0	1	1	1	1	1	1	1	1	1	1	1	1	0	0	0	0	1	1	1	1	0	0
3	0	1	1	3	1	1	1	1	1	1	1	1	1	1	1	1	1	1	1	1	1	1	1	1	1	1	1	1	1	1	1	1	1	1	1	0	0	1	1	0	0	1	1	1	1	1	1	0	0
0	0	0	0	1	0	1	0	1	1	1	1	0	0	0	0	1	1	0	0	1	1	1	1	1	1	2	0	1	1	1	1	1	1	1	1	1	1	1	1	0	0	1	1	1	1	1	1	0	0
3	0	1	1	3	1	1	1	1	1	1	1	0	0	1	1	0	0	0	0	2	0	1	1	1	1	0	0	1	1	1	1	1	1	1	1	0	0	1	1	1	1	1	1	1	1	1	1	0	0
0	0	0	0	0	0	0	1	1	1	2	0	2	0	1	1	0	0	1	1	1	1	1	1	0	0	2	0	1	1	0	0	1	1	0	0	1	1	1	1	1	1	1	1	1	1	1	1	0	0
4	0	1	1	2	1	1	1	1	1	1	1	1	1	0	0	1	1	1	1	0	0	2	0	1	1	1	1	1	1	1	1	1	1	1	1	0	0	1	1	2	0	1	1	1	1	1	1	0	0
2	1	1	1	1	3	2	1	1	1	1	1	1	1	0	0	0	0	0	0	0	0	1	1	1	1	1	1	1	1	1	1	1	1	0	0	1	1	1	1	2	0	1	1	1	1	1	1	0	0
3	0	1	1	1	1	1	1	1	1	1	1	1	1	0	0	2	0	0	0	1	1	1	1	1	1	1	1	1	1	1	1	1	1	1	1	0	0	1	1	0	0	2	0	1	1	1	1	0	0
2	1	1	1	3	1	1	1	1	1	1	1	1	1	1	1	2	0	0	0	2	0	1	1	1	1	1	1	1	1	1	1	1	1	1	1	0	0	1	1	0	0	2	0	1	1	1	1	0	0
0	1	0	0	0	0	2	1	1	1	2	0	1	1	2	0	0	0	2	0	2	0	1	1	1	1	1	1	1	1	1	1	1	1	1	1	0	0	1	1	0	0	2	0	1	1	1	1	0	0
2	0	1	1	1	3	1	1	0	0	1	1	1	1	2	0	2	0	1	1	1	1	1	1	1	1	2	0	1	1	1	1	1	1	1	1	0	0	1	1	0	0	2	0	1	1	1	1	0	0
2	0	1	1	1	1	1	1	1	1	1	1	0	0	0	0	1	1	2	0	2	0	1	1	1	1	1	1	2	0	1	1	1	1	1	1	0	0	1	1	2	0	2	0	1	1	1	1	0	0
2	1	0	1	2	1	1	1	1	1	1	1	1	1	1	1	2	0	0	0	2	0	1	1	1	1	1	1	1	1	1	1	1	1	1	1	1	1	1	1	2	0	2	0	1	1	1	1	0	0
2	0	1	1	1	1	2	1	1	1	1	1	1	1	1	1	1	1	2	0	0	0	1	1	1	1	2	0	1	1	1	1	1	1	0	0	2	0	1	1	2	0	2	0	1	1	1	1	0	0
2	1	2	1	1	1	2	1	1	1	0	0	1	1	2	0	0	0	0	0	0	0	1	1	1	1	0	0	1	1	1	1	1	1	1	1	2	0	1	1	2	0	2	0	1	1	1	1	0	0
3	0	3	0	3	0	1	1	2	0	0	0	2	0	0	0	1	1	1	1	0	0	0	0	0	0	2	0	2	0	1	1	0	0	1	1	0	0	1	1	0	0	3	0	1	1	1	1	0	0
1	0	0	1	1	0	1	1	1	1	1	1	0	0	1	1	0	0	0	0	0	0	1	1	0	0	0	0	0	0	0	0	1	1	1	1	1	1	0	0	0	0	2	0	2	0	1	1	0	0
2	0	1	1	1	1	2	1	1	1	1	1	1	1	0	0	0	0	0	0	1	1	1	1	1	1	1	1	1	1	1	1	1	1	1	1	1	1	1	1	0	0	3	0	3	0	1	1	0	0
0	1	0	0	0	0	1	1	1	1	2	0	1	1	2	0	2	0	2	0	1	1	1	1	2	0	2	0	2	0	2	0	2	0	2	0	2	0	2	0	2	0	3	0	3	0	2	0	0	0
1	1	2	0	2	0	1	0	0	0	0	0	0	0	0	0	1	1	1	1	0	0	2	0	2	0	2	0	2	0	0	0	0	0	0	0	1	1	0	0	1	1	0	0	0	0	0	0	1	1
1	0	0	0	1	2	0	0	1	1	0	0	0	0	1	1	0	0	0	0	0	0	0	0	0	0	0	0	0	0	0	0	0	0	0	0	1	1	0	0	1	1	2	0	0	0	0	0	1	1
0	1	0	0	0	0	1	1	0	0	1	1	1	1	0	0	1	1	1	1	1	1	1	1	1	1	1	1	1	1	1	1	1	1	1	1	0	0	1	1	0	0	1	1	1	1	0	0	1	1
3	1	1	1	3	1	1	1	1	1	1	1	1	1	0	0	0	0	0	0	1	1	1	1	1	1	1	1	1	1	1	1	1	1	1	1	1	1	1	1	1	1	2	0	1	1	0	0	1	1
3	1	1	0	0	1	2	2	0	0	0	0	0	0	1	1	1	1	0	0	2	0	2	0	2	0	2	0	2	0	0	0	2	0	2	0	2	0	1	1	1	1	2	0	1	1	0	0	1	1
1	1	1	1	1	1	1	1	0	0	1	1	1	1	0	0	1	1	1	1	1	1	1	1	1	1	1	1	2	0	0	0	2	0	2	0	2	0	2	0	2	0	2	0	1	1	0	0	1	1
0	0	1	0	0	0	0	0	1	1	0	0	0	0	1	1	0	0	0	0	0	0	0	0	0	0	0	0	0	0	0	0	0	0	0	0	1	1	0	0	1	1	1	1	2	0	0	0	1	1
1	0	3	0	1	1	1	1	1	1	0	0	0	0	1	1	2	0	0	0	2	0	0	0	2	0	1	1	2	0	0	0	2	0	0	0	0	0	0	0	2	0	3	0	2	0	0	0	1	1
2	0	1	0	2	4	2	2	2	0	2	0	2	0	1	1	0	0	0	0	0	0	0	0	1	1	0	0	2	0	0	0	2	0	0	0	2	0	0	0	2	0	3	0	2	0	0	0	1	1
2	1	0	1	1	1	2	2	2	0	2	0	1	1	2	0	2	0	2	0	2	0	2	0	1	1	2	0	1	1	1	1	1	1	2	0	2	0	1	1	0	0	3	0	3	0	0	0	1	1
1	1	1	0	1	5	0	2	2	0	0	0	0	0	1	1	0	0	0	0	0	0	0	0	0	0	0	0	0	0	0	0	0	0	0	0	1	1	0	0	2	0	3	0	3	0	0	0	1	1
0	1	1	0	0	5	0	1	1	1	1	1	1	1	0	0	1	1	1	1	1	1	1	1	1	1	1	1	1	1	1	1	1	1	1	1	0	0	1	1	0	0	0	0	0	0	1	1	1	1
0	1	1	0	0	1	0	1	1	1	1	1	1	1	0	0	1	1	1	1	1	1	1	1	1	1	1	1	1	1	1	1	1	1	1	1	0	0	1	1	0	0	0	0	0	0	1	1	1	1
0	1	0	0	0	0	0	1	1	1	1	1	1	1	0	0	1	1	1	1	1	1	1	1	1	1	1	1	1	1	1	1	1	1	1	1	0	0	1	1	0	0	0	0	0	0	1	1	1	1
0	1	0	0	0	0	2	1	1	1	2	0	1	1	0	0	2	0	1	1	0	0	1	1	1	1	1	1	0	0	0	0	0	0	0	0	1	1	0	0	1	1	0	0	0	0	1	1	1	1
0	1	0	0	0	4	0	1	1	1	1	1	1	1	0	0	0	0	0	0	0	0	1	1	1	1	1	1	1	1	0	0	0	0	0	0	1	1	0	0	1	1	0	0	0	0	1	1	1	1
0	1	0	0	0	0	0	1	1	1	1	1	1	1	1	1	1	1	0	0	1	1	1	1	0	0	1	1	0	0	2	0	0	0	2	0	2	0	0	0	1	1	0	0	0	0	1	1	1	1
0	1	0	0	0	0	0	1	1	1	1	1	1	1	0	0	0	0	1	1	0	0	2	0	2	0	0	0	1	1	1	1	0	0	0	0	0	0	1	1	1	1	0	0	0	0	1	1	1	1
2	1	0	1	1	1	2	1	1	1	1	1	1	1	0	0	1	1	0	0	0	0	1	1	1	1	1	1	1	1	1	1	1	1	1	1	2	0	2	0	0	0	1	1	0	0	1	1	1	1
0	1	0	0	0	5	0	1	1	1	1	1	1	1	1	1	1	1	0	0	1	1	1	1	0	0	1	1	0	0	0	0	1	1	0	0	0	0	0	0	0	0	2	0	0	0	1	1	1	1
2	0	0	1	2	2	1	0	1	1	0	0	0	0	1	1	0	0	1	1	1	1	1	1	1	1	1	1	1	1	1	1	1	1	1	1	0	0	1	1	0	0	2	0	0	0	1	1	1	1
3	0	1	1	1	1	0	1	1	1	1	1	0	0	0	0	0	0	0	0	0	0	1	1	1	1	1	1	1	1	1	1	1	1	0	0	1	1	1	1	0	0	2	0	0	0	1	1	1	1
2	1	1	1	3	1	2	1	1	1	1	1	0	0	0	0	1	1	0	0	0	0	1	1	1	1	1	1	1	1	1	1	1	1	1	1	1	1	1	1	0	0	2	0	0	0	1	1	1	1
0	1	0	1	0	1	0	1	1	1	1	1	1	1	1	1	0	0	0	0	0	0	1	1	1	1	2	0	0	0	0	0	0	0	0	0	1	1	0	0	1	1	2	0	0	0	1	1	1	1
0	1	0	1	0	5	0	1	1	1	1	1	1	1	0	0	1	1	1	1	1	1	1	1	1	1	1	1	1	1	0	0	0	0	1	1	1	1	0	0	1	1	2	0	0	0	1	1	1	1
0	1	0	0	0	5	1	1	1	1	1	1	1	1	0	0	1	1	1	1	0	0	1	1	1	1	1	1	1	1	1	1	1	1	1	1	1	1	0	0	1	1	2	0	0	0	1	1	1	1
1	1	1	1	1	3	1	1	1	1	1	1	1	1	0	0	0	0	0	0	1	1	1	1	1	1	1	1	0	0	1	1	1	1	1	1	1	1	2	0	2	0	2	0	0	0	1	1	1	1
0	1	0	0	0	3	2	1	1	1	0	0	1	1	1	1	1	1	0	0	1	1	0	0	1	1	0	0	0	0	1	1	0	0	0	0	1	1	2	0	2	0	0	0	1	1	1	1	1	1
2	0	1	1	1	1	0	1	1	1	1	1	2	0	1	1	1	1	1	1	0	0	1	1	1	1	1	1	1	1	1	1	1	1	1	1	1	1	1	1	0	0	1	1	1	1	1	1	1	1
3	0	1	1	1	1	1	1	1	1	1	1	2	0	0	0	1	1	1	1	1	1	1	1	1	1	1	1	1	1	1	1	1	1	1	1	2	0	2	0	0	0	1	1	1	1	1	1	1	1
0	0	1	1	1	2	1	1	1	1	1	1	1	1	0	0	2	0	2	0	1	1	2	0	1	1	0	0	1	1	1	1	1	1	1	1	0	0	0	0	1	1	1	1	1	1	1	1	1	1
2	0	1	1	1	1	1	1	1	1	1	1	1	1	1	1	1	1	1	1	1	1	1	1	1	1	1	1	1	1	1	1	1	1	0	0	1	1	1	1	1	1	1	1	1	1	1	1	1	1
3	0	1	1	3	1	1	1	1	1	1	1	2	0	1	1	0	0	0	0	2	0	1	1	1	1	1	1	1	1	1	1	1	1	1	1	1	1	1	1	2	0	1	1	1	1	1	1	1	1
0	0	0	0	0	5	2	0	1	1	1	1	2	0	1	1	1	1	1	1	1	1	2	0	1	1	2	0	2	0	2	0	2	0	0	0	2	0	2	0	2	0	1	1	1	1	1	1	1	1
0	1	0	0	0	5	2	1	1	1	2	0	2	0	2	0	2	0	2	0	2	0	2	0	2	0	2	0	2	0	2	0	0	0	0	0	0	0	1	1	0	0	2	0	1	1	1	1	1	1
3	1	1	1	1	1	2	1	1	1	1	1	1	1	1	1	0	0	0	0	0	0	1	1	1	1	1	1	1	1	1	1	1	1	1	1	0	0	1	1	0	0	2	0	1	1	1	1	1	1
0	0	0	0	1	5	1	1	1	1	1	1	1	1	2	0	1	1	1	1	2	0	1	1	1	1	1	1	1	1	1	1	1	1	1	1	0	0	1	1	0	0	2	0	1	1	1	1	1	1
1	0	1	1	1	5	1	1	1	1	1	1	1	1	0	0	1	1	0	0	0	0	0	0	2	0	2	0	2	0	2	0	1	1	1	1	0	0	1	1	0	0	2	0	1	1	1	1	1	1
0	1	0	0	0	3	0	1	1	1	1	1	1	1	1	1	0	0	1	1	1	1	1	1	1	1	1	1	1	1	1	1	1	1	0	0	1	1	1	1	0	0	2	0	1	1	1	1	1	1
2	0	1	1	1	1	1	1	1	1	1	1	1	1	0	0	0	0	2	0	2	0	1	1	1	1	0	0	1	1	1	1	1	1	1	1	1	1	1	1	0	0	2	0	1	1	1	1	1	1
0	1	0	0	0	0	2	1	1	1	1	1	1	1	2	0	2	0	1	1	2	0	2	0	2	0	1	1	0	0	0	0	0	0	0	0	0	0	0	0	1	1	2	0	1	1	1	1	1	1
1	1	1	0	1	2	1	1	1	1	0	0	2	0	1	1	1	1	1	1	1	1	0	0	1	1	1	1	1	1	0	0	0	0	0	0	1	1	0	0	1	1	2	0	1	1	1	1	1	1
2	1	1	1	1	1	1	1	1	1	1	1	1	1	1	1	0	0	0	0	0	0	1	1	1	1	1	1	1	1	0	0	0	0	0	0	1	1	1	1	1	1	2	0	1	1	1	1	1	1
1	1	2	1	1	0	1	1	1	1	1	1	1	1	0	0	1	1	0	0	0	0	1	1	0	0	0	0	0	0	2	0	0	0	0	0	1	1	1	1	1	1	2	0	1	1	1	1	1	1
1	1	1	1	1	3	1	1	1	1	1	1	1	1	0	0	2	0	2	0	1	1	1	1	1	1	0	0	1	1	1	1	1	1	0	0	1	1	1	1	1	1	2	0	1	1	1	1	1	1
3	1	1	1	3	1	1	1	1	1	1	1	1	1	0	0	0	0	0	0	1	1	1	1	1	1	1	1	1	1	1	1	1	1	1	1	1	1	1	1	1	1	2	0	1	1	1	1	1	1
3	0	1	1	1	1	0	1	1	1	1	1	1	1	0	0	1	1	0	0	1	1	1	1	1	1	1	1	0	0	1	1	1	1	0	0	2	0	1	1	2	0	2	0	1	1	1	1	1	1
2	1	1	1	3	1	2	1	1	1	1	1	1	1	2	0	1	1	1	1	2	0	1	1	1	1	2	0	1	1	1	1	1	1	1	1	2	0	1	1	2	0	2	0	1	1	1	1	1	1
1	0	0	0	2	4	0	1	1	1	1	1	0	0	2	0	2	0	2	0	2	0	0	0	2	0	2	0	2	0	2	0	0	0	2	0	0	0	2	0	2	0	3	0	1	1	1	1	1	1
0	1	0	0	0	3	0	1	1	1	1	1	1	1	1	1	0	0	0	0	2	0	1	1	0	0	0	0	1	1	1	1	1	1	0	0	1	1	0	0	1	1	0	0	2	0	1	1	1	1
2	1	0	0	1	1	1	1	1	1	1	1	2	0	2	0	2	0	2	0	2	0	2	0	2	0	2	0	2	0	2	0	2	0	2	0	2	0	1	1	1	1	1	1	2	0	1	1	1	1
2	0	1	1	2	1	2	1	1	1	1	1	2	0	2	0	2	0	1	1	1	1	1	1	1	1	1	1	1	1	1	1	1	1	1	1	2	0	1	1	2	0	1	1	3	0	1	1	1	1
3	1	1	1	2	1	1	1	1	1	1	1	1	1	2	0	0	0	2	0	2	0	1	1	1	1	1	1	1	1	1	1	2	0	2	0	2	0	1	1	2	0	1	1	3	0	1	1	1	1
0	1	0	0	0	5	2	1	1	1	2	0	0	0	0	0	1	1	0	0	1	1	0	0	1	1	0	0	2	0	2	0	2	0	2	0	2	0	2	0	2	0	2	0	3	0	1	1	1	1
2	0	0	0	2	2	0	1	1	1	1	1	0	0	0	0	0	0	2	0	1	1	2	0	2	0	2	0	2	0	2	0	2	0	2	0	0	0	2	0	1	1	3	0	3	0	1	1	1	1
3	1	1	1	2	1	1	1	1	1	1	1	2	0	1	1	1	1	2	0	1	1	1	1	1	1	2	0	1	1	1	1	1	1	0	0	0	0	1	1	2	0	3	0	3	0	1	1	1	1
0	1	1	0	0	5	2	1	1	1	0	0	1	1	1	1	1	1	0	0	1	1	0	0	1	1	0	0	1	1	0	0	1	1	0	0	0	0	2	0	2	0	3	0	3	0	1	1	1	1
0	0	0	0	0	2	2	1	1	1	0	0	1	1	1	1	1	1	1	1	1	1	0	0	2	0	2	0	2	0	2	0	2	0	2	0	2	0	2	0	2	0	3	0	3	0	1	1	1	1
1	1	3	0	2	1	2	2	2	0	2	0	2	0	2	0	2	0	2	0	2	0	2	0	2	0	2	0	2	0	2	0	2	0	2	0	2	0	2	0	2	0	3	0	3	0	1	1	1	1
0	1	1	0	0	5	2	1	1	1	2	0	2	0	2	0	2	0	2	0	2	0	2	0	2	0	2	0	2	0	2	0	2	0	2	0	2	0	2	0	2	0	3	0	3	0	1	1	1	1
0	1	1	0	0	4	1	1	1	1	2	0	1	1	2	0	2	0	2	0	2	0	2	0	2	0	2	0	2	0	2	0	2	0	2	0	2	0	2	0	2	0	3	0	3	0	1	1	1	1
0	1	1	1	1	1	1	1	1	1	0	0	0	0	1	1	0	0	0	0	0	0	0	0	0	0	0	0	0	0	0	0	0	0	0	0	1	1	0	0	1	1	0	0	1	1	2	0	1	1
4	1	2	0	1	3	2	2	2	0	2	0	2	0	0	0	0	0	0	0	1	1	1	1	2	0	2	0	0	0	1	1	1	1	1	1	0	0	1	1	2	0	3	0	2	0	2	0	1	1
0	1	1	0	1	1	0	0	1	1	0	0	0	0	1	1	1	1	0	0	0	0	2	0	2	0	0	0	0	0	2	0	0	0	0	0	0	0	1	1	2	0	2	0	0	0	0	0	2	0
0	1	0	0	0	3	0	2	1	1	2	0	0	0	2	0	1	1	2	0	0	0	2	0	1	1	0	0	0	0	2	0	2	0	0	0	2	0	2	0	2	0	2	0	2	0	0	0	2	0
3	0	1	1	1	1	0	1	1	1	0	0	1	1	0	0	0	0	0	0	0	0	1	1	1	1	1	1	1	1	1	1	1	1	1	1	1	1	1	1	0	0	2	0	0	0	1	1	2	0
0	0	0	0	1	3	1	1	1	1	0	0	1	1	2	0	1	1	1	1	0	0	1	1	1	1	0	0	1	1	1	1	1	1	1	1	1	1	2	0	0	0	2	0	0	0	1	1	2	0
0	0	0	1	1	0	2	0	1	1	1	1	1	1	2	0	0	0	1	1	1	1	1	1	1	1	0	0	2	0	1	1	1	1	1	1	2	0	2	0	0	0	2	0	0	0	1	1	2	0
2	0	0	1	1	1	2	1	1	1	1	1	0	0	2	0	0	0	2	0	0	0	1	1	1	1	1	1	1	1	1	1	1	1	1	1	2	0	1	1	2	0	2	0	0	0	1	1	2	0
2	1	0	1	0	0	1	1	0	0	1	1	0	0	1	1	1	1	2	0	2	0	2	0	0	0	0	0	1	1	1	1	0	0	0	0	2	0	2	0	0	0	0	0	1	1	1	1	2	0
3	0	1	1	1	1	1	1	1	1	1	1	1	1	1	1	1	1	1	1	1	1	1	1	1	1	1	1	1	1	1	1	1	1	1	1	0	0	1	1	0	0	1	1	1	1	1	1	2	0
3	1	1	1	2	1	1	1	1	1	1	1	1	1	1	1	1	1	0	0	1	1	0	0	2	0	2	0	2	0	2	0	2	0	2	0	1	1	1	1	0	0	1	1	1	1	1	1	2	0
4	0	1	1	1	1	1	1	1	1	1	1	1	1	0	0	1	1	2	0	1	1	1	1	1	1	1	1	1	1	1	1	1	1	1	1	2	0	1	1	0	0	1	1	1	1	1	1	2	0
0	0	0	0	0	0	2	1	1	1	2	0	1	1	1	1	0	0	0	0	1	1	1	1	1	1	1	1	0	0	0	0	1	1	0	0	2	0	2	0	0	0	1	1	1	1	1	1	2	0
2	0	1	1	1	0	1	1	1	1	1	1	1	1	1	1	1	1	1	1	1	1	1	1	1	1	1	1	1	1	1	1	1	1	1	1	1	1	1	1	1	1	1	1	1	1	1	1	2	0
2	1	1	1	2	1	0	1	1	1	1	1	1	1	1	1	0	0	0	0	1	1	1	1	1	1	1	1	0	0	1	1	1	1	2	0	1	1	1	1	1	1	1	1	1	1	1	1	2	0
2	0	1	1	2	1	1	1	1	1	1	1	2	0	0	0	2	0	0	0	2	0	1	1	1	1	1	1	1	1	1	1	1	1	1	1	2	0	2	0	1	1	1	1	1	1	1	1	2	0
4	0	1	1	2	1	1	1	1	1	1	1	1	1	1	1	1	1	0	0	2	0	1	1	1	1	1	1	1	1	1	1	1	1	1	1	1	1	0	0	0	0	2	0	1	1	1	1	2	0
1	0	1	1	1	2	1	1	0	0	1	1	1	1	1	1	1	1	1	1	0	0	1	1	0	0	0	0	2	0	2	0	2	0	1	1	0	0	1	1	0	0	2	0	1	1	1	1	2	0
0	0	0	0	0	0	1	0	1	1	1	1	1	1	0	0	1	1	2	0	2	0	1	1	1	1	2	0	1	1	2	0	1	1	1	1	1	1	1	1	0	0	2	0	1	1	1	1	2	0
2	0	1	1	1	1	1	1	0	0	1	1	1	1	2	0	1	1	0	0	2	0	1	1	1	1	2	0	1	1	1	1	1	1	1	1	2	0	1	1	0	0	2	0	1	1	1	1	2	0
4	0	1	1	1	1	1	1	1	1	1	1	1	1	0	0	1	1	1	1	1	1	1	1	1	1	1	1	1	1	1	1	1	1	0	0	1	1	1	1	1	1	2	0	1	1	1	1	2	0
4	0	1	1	2	0	1	1	1	1	1	1	1	1	1	1	1	1	1	1	1	1	1	1	1	1	0	0	0	0	1	1	1	1	1	1	1	1	2	0	1	1	2	0	1	1	1	1	2	0
2	1	0	1	1	1	1	1	1	1	1	1	1	1	1	1	0	0	0	0	2	0	1	1	1	1	1	1	1	1	1	1	2	0	2	0	1	1	1	1	2	0	2	0	1	1	1	1	2	0
2	1	1	1	1	1	2	1	1	1	1	1	1	1	1	1	2	0	2	0	2	0	1	1	1	1	0	0	2	0	1	1	2	0	0	0	2	0	1	1	2	0	2	0	1	1	1	1	2	0
2	1	1	1	1	1	1	1	1	1	2	0	1	1	2	0	0	0	2	0	2	0	1	1	1	1	1	1	1	1	1	1	1	1	1	1	0	0	1	1	0	0	3	0	1	1	1	1	2	0
3	0	1	1	2	1	1	1	1	1	2	0	1	1	1	1	2	0	1	1	2	0	1	1	1	1	2	0	1	1	1	1	1	1	1	1	2	0	2	0	0	0	3	0	1	1	1	1	2	0
0	0	0	0	0	3	2	1	1	1	2	0	2	0	0	0	2	0	1	1	2	0	2	0	1	1	0	0	2	0	2	0	2	0	2	0	2	0	2	0	2	0	2	0	2	0	1	1	2	0
0	1	0	0	0	3	2	1	1	1	1	1	2	0	1	1	1	1	1	1	2	0	1	1	1	1	2	0	1	1	2	0	1	1	1	1	0	0	2	0	2	0	0	0	3	0	1	1	2	0
0	0	0	0	1	0	2	1	0	0	1	1	2	0	1	1	1	1	1	1	2	0	1	1	1	1	1	1	1	1	1	1	2	0	2	0	2	0	2	0	2	0	1	1	3	0	1	1	2	0
0	1	0	0	0	3	0	1	1	1	2	0	2	0	2	0	1	1	1	1	1	1	1	1	1	1	2	0	1	1	1	1	1	1	1	1	2	0	1	1	0	0	2	0	3	0	1	1	2	0
1	1	1	1	1	1	0	1	1	1	1	1	1	1	2	0	2	0	1	1	2	0	1	1	1	1	1	1	1	1	0	0	0	0	0	0	0	0	1	1	2	0	3	0	3	0	1	1	2	0
3	1	1	1	2	1	2	1	1	1	1	1	1	1	1	1	1	1	0	0	2	0	1	1	1	1	2	0	2	0	1	1	1	1	1	1	2	0	1	1	2	0	3	0	3	0	1	1	2	0
0	1	0	0	0	3	1	2	1	1	1	1	2	0	2	0	2	0	2	0	2	0	1	1	1	1	2	0	1	1	1	1	1	1	1	1	1	1	2	0	2	0	3	0	3	0	1	1	2	0
0	1	0	0	0	3	2	1	0	0	1	1	2	0	2	0	2	0	1	1	0	0	1	1	1	1	1	1	1	1	1	1	1	1	0	0	2	0	2	0	2	0	2	0	0	0	2	0	2	0
1	1	1	0	1	2	0	0	1	1	2	0	0	0	1	1	0	0	0	0	0	0	0	0	0	0	0	0	0	0	0	0	0	0	0	0	1	1	0	0	1	1	2	0	1	1	2	0	2	0
3	1	1	1	2	1	1	1	1	1	1	1	0	0	2	0	2	0	0	0	1	1	1	1	1	1	1	1	1	1	1	1	1	1	0	0	2	0	1	1	2	0	1	1	1	1	0	0	0	0
0	0	0	0	0	0	1	1	1	1	0	0	1	1	1	1	1	1	1	1	1	1	1	1	1	1	1	1	1	1	0	0	1	1	0	0	0	0	1	1	2	0	2	0	1	1	1	1	0	0
0	1	0	0	0	3	1	2	1	1	1	1	0	0	1	1	1	1	1	1	1	1	1	1	0	0	1	1	1	1	1	1	1	1	1	1	1	1	1	1	1	1	1	1	1	1	2	0	0	0
2	1	1	1	3	1	1	1	1	1	1	1	1	1	1	1	1	1	1	1	1	1	1	1	1	1	1	1	1	1	1	1	1	1	0	0	0	0	1	1	0	0	1	1	0	0	1	1	1	1
1	0	1	0	1	3	1	1	1	1	0	0	2	0	0	0	1	1	1	1	1	1	0	0	2	0	0	0	0	0	1	1	1	1	0	0	1	1	0	0	1	1	1	1	1	1	1	1	1	1
2	0	1	1	1	1	0	1	1	1	1	1	2	0	1	1	1	1	0	0	2	0	1	1	1	1	0	0	2	0	1	1	2	0	2	0	1	1	1	1	1	1	2	0	1	1	1	1	1	1
1	0	1	1	1	1	2	1	1	1	1	1	2	0	1	1	2	0	2	0	2	0	1	1	1	1	1	1	1	1	1	1	1	1	1	1	2	0	1	1	0	0	3	0	3	0	1	1	1	1
0	0	0	0	0	2	1	0	1	1	1	1	2	0	1	1	1	1	2	0	2	0	1	1	1	1	2	0	2	0	2	0	2	0	2	0	2	0	2	0	2	0	3	0	0	0	1	1	2	0
1	0	0	1	1	2	1	1	0	0	1	1	1	1	2	0	2	0	1	1	1	1	1	1	1	1	0	0	2	0	0	0	0	0	0	0	1	1	0	0	1	1	2	0	1	1	1	1	2	0
2	0	1	1	1	1	0	1	1	1	1	1	1	1	1	1	1	1	2	0	0	0	1	1	1	1	1	1	1	1	1	1	2	0	1	1	2	0	2	0	1	1	2	0	1	1	1	1	2	0
1	0	1	1	1	5	1	1	0	0	1	1	1	1	1	1	0	0	1	1	1	1	1	1	1	1	1	1	0	0	0	0	0	0	1	1	1	1	0	0	0	0	2	0	2	0	1	1	2	0
0	1	0	0	0	4	0	1	1	1	0	0	2	0	1	1	2	0	2	0	2	0	1	1	1	1	2	0	2	0	2	0	2	0	2	0	2	0	2	0	2	0	0	0	3	0	1	1	2	0
2	1	1	1	2	1	0	2	1	1	2	0	2	0	2	0	2	0	2	0	2	0	1	1	1	1	1	1	1	1	1	1	1	1	2	0	2	0	2	0	0	0	2	0	3	0	1	1	2	0
2	0	1	1	3	5	0	1	1	1	1	1	1	1	1	1	1	1	1	1	1	1	0	0	1	1	0	0	2	0	1	1	2	0	2	0	2	0	1	1	2	0	2	0	3	0	1	1	2	0
2	0	1	1	1	1	1	1	1	1	1	1	1	1	2	0	2	0	1	1	2	0	0	0	1	1	1	1	1	1	0	0	1	1	2	0	2	0	2	0	2	0	3	0	3	0	1	1	2	0
0	0	0	0	1	0	1	1	1	1	1	1	1	1	2	0	1	1	1	1	2	0	2	0	2	0	2	0	1	1	1	1	1	1	2	0	2	0	2	0	2	0	2	0	0	0	2	0	2	0
2	1	1	1	2	2	0	1	1	1	2	0	2	0	1	1	0	0	0	0	0	0	0	0	2	0	0	0	0	0	2	0	0	0	2	0	1	1	2	0	1	1	1	1	3	0	2	0	2	0
0	1	0	0	0	3	1	1	2	0	2	0	2	0	1	1	2	0	1	1	2	0	1	1	1	1	1	1	2	0	1	1	2	0	2	0	1	1	2	0	2	0	2	0	3	0	2	0	2	0
0	0	0	0	3	0	1	1	2	0	1	1	1	1	0	0	1	1	1	1	1	1	1	1	1	1	1	1	1	1	1	1	1	1	1	1	0	0	1	1	0	0	1	1	1	1	0	0	0	0
0	1	1	0	0	3	1	1	1	1	1	1	1	1	0	0	0	0	0	0	1	1	1	1	1	1	0	0	1	1	1	1	1	1	1	1	1	1	1	1	2	0	2	0	1	1	0	0	0	0
0	1	0	0	2	3	1	0	0	0	0	0	1	1	1	1	1	1	1	1	1	1	1	1	0	0	1	1	2	0	2	0	1	1	0	0	0	0	0	0	0	0	1	1	2	0	0	0	0	0
0	1	0	0	0	3	0	0	0	0	1	1	1	1	0	0	1	1	0	0	0	0	1	1	1	1	1	1	0	0	1	1	1	1	1	1	0	0	1	1	0	0	0	0	0	0	1	1	0	0
0	1	0	0	0	3	1	1	1	1	1	1	1	1	0	0	0	0	1	1	1	1	1	1	1	1	1	1	1	1	1	1	1	1	1	1	0	0	1	1	0	0	0	0	0	0	1	1	0	0
2	1	0	1	1	0	1	1	0	0	1	1	1	1	0	0	0	0	1	1	1	1	1	1	1	1	1	1	1	1	1	1	1	1	1	1	0	0	1	1	0	0	0	0	0	0	1	1	0	0
0	1	0	0	0	3	0	1	0	0	1	1	0	0	1	1	0	0	1	1	1	1	1	1	1	1	1	1	1	1	1	1	1	1	1	1	0	0	1	1	0	0	0	0	0	0	1	1	0	0
0	0	0	0	1	5	1	1	1	1	0	0	1	1	0	0	1	1	1	1	1	1	1	1	1	1	1	1	1	1	1	1	1	1	1	1	0	0	1	1	0	0	0	0	0	0	1	1	0	0
0	0	1	0	1	0	1	1	0	0	1	1	1	1	0	0	1	1	1	1	1	1	1	1	1	1	1	1	1	1	1	1	1	1	1	1	0	0	1	1	0	0	0	0	0	0	1	1	0	0
1	0	1	1	1	0	1	1	0	0	1	1	1	1	0	0	1	1	1	1	1	1	1	1	1	1	1	1	1	1	1	1	1	1	1	1	0	0	1	1	0	0	0	0	0	0	1	1	0	0
0	0	0	0	0	3	2	1	0	0	1	1	1	1	0	0	1	1	1	1	1	1	1	1	1	1	1	1	1	1	1	1	1	1	1	1	0	0	1	1	0	0	0	0	0	0	1	1	0	0
0	0	0	0	0	0	2	2	0	0	1	1	0	0	1	1	1	1	1	1	1	1	1	1	1	1	1	1	1	1	1	1	1	1	1	1	0	0	1	1	0	0	0	0	0	0	1	1	0	0
2	0	1	1	3	1	2	2	1	1	2	0	0	0	2	0	1	1	2	0	2	0	1	1	1	1	1	1	1	1	1	1	1	1	1	1	0	0	1	1	0	0	0	0	0	0	1	1	0	0
2	0	1	0	2	0	1	1	0	0	1	1	1	1	0	0	1	1	1	1	1	1	1	1	1	1	1	1	1	1	1	1	1	1	1	1	0	0	1	1	0	0	1	1	0	0	1	1	0	0
2	1	1	0	1	0	1	1	1	1	1	1	2	0	1	1	1	1	1	1	0	0	1	1	0	0	0	0	1	1	1	1	1	1	1	1	0	0	1	1	0	0	2	0	0	0	1	1	0	0
0	0	0	1	0	0	1	1	0	0	1	1	1	1	0	0	1	1	1	1	1	1	1	1	1	1	1	1	1	1	1	1	1	1	1	1	0	0	1	1	0	0	2	0	0	0	1	1	0	0
0	0	0	0	1	0	1	1	0	0	1	1	1	1	0	0	1	1	1	1	1	1	1	1	1	1	1	1	1	1	1	1	1	1	1	1	0	0	1	1	0	0	2	0	0	0	1	1	0	0
2	0	1	1	0	0	2	1	0	0	1	1	1	1	2	0	1	1	1	1	1	1	1	1	1	1	1	1	1	1	1	1	1	1	1	1	0	0	1	1	0	0	2	0	0	0	1	1	0	0
2	0	1	1	1	1	1	1	0	0	1	1	1	1	0	0	0	0	0	0	0	0	1	1	1	1	1	1	1	1	1	1	1	1	1	1	1	1	1	1	1	1	2	0	0	0	1	1	0	0
1	0	0	0	0	0	0	1	1	1	0	0	0	0	1	1	0	0	1	1	0	0	1	1	1	1	1	1	1	1	0	0	1	1	1	1	0	0	1	1	0	0	0	0	1	1	1	1	0	0
1	1	1	1	1	4	1	1	1	1	1	1	1	1	0	0	1	1	0	0	1	1	0	0	2	0	2	0	1	1	2	0	0	0	0	0	0	0	1	1	0	0	1	1	1	1	1	1	0	0
0	0	0	0	0	1	1	1	1	1	2	0	1	1	2	0	2	0	1	1	1	1	1	1	1	1	1	1	1	1	1	1	1	1	1	1	2	0	1	1	0	0	1	1	1	1	1	1	0	0
3	1	1	1	3	1	1	1	1	1	1	1	1	1	0	0	1	1	0	0	1	1	1	1	1	1	1	1	1	1	1	1	1	1	1	1	1	1	1	1	2	0	1	1	1	1	1	1	0	0
0	0	0	0	0	0	2	1	1	1	1	1	1	1	1	1	1	1	1	1	1	1	1	1	1	1	1	1	1	1	1	1	1	1	1	1	1	1	1	1	2	0	1	1	1	1	1	1	0	0
2	0	1	1	1	0	1	1	1	1	1	1	1	1	2	0	1	1	1	1	2	0	1	1	1	1	1	1	1	1	2	0	1	1	1	1	1	1	1	1	0	0	2	0	1	1	1	1	0	0
2	0	1	0	2	2	1	0	1	1	0	0	1	1	0	0	1	1	1	1	1	1	1	1	2	0	2	0	1	1	1	1	2	0	2	0	2	0	2	0	0	0	2	0	1	1	1	1	0	0
1	0	0	1	1	0	2	1	1	1	1	1	2	0	2	0	2	0	2	0	2	0	1	1	1	1	1	1	1	1	2	0	2	0	2	0	2	0	2	0	0	0	2	0	1	1	1	1	0	0
0	1	0	0	1	0	2	2	1	1	2	0	1	1	1	1	2	0	2	0	0	0	1	1	1	1	1	1	1	1	1	1	1	1	2	0	1	1	1	1	1	1	2	0	1	1	1	1	0	0
0	1	0	0	0	3	1	1	1	1	1	1	2	0	0	0	1	1	1	1	2	0	1	1	2	0	2	0	1	1	1	1	1	1	1	1	2	0	0	0	2	0	2	0	1	1	1	1	0	0
3	0	1	1	3	1	1	1	1	1	1	1	1	1	1	1	1	1	0	0	0	0	1	1	1	1	1	1	1	1	1	1	1	1	1	1	2	0	1	1	2	0	2	0	1	1	1	1	0	0
0	0	0	1	0	0	2	1	1	1	1	1	2	0	1	1	1	1	1	1	2	0	1	1	1	1	1	1	2	0	0	0	1	1	1	1	2	0	2	0	2	0	2	0	1	1	1	1	0	0
0	0	0	0	0	0	1	1	1	1	1	1	1	1	0	0	1	1	1	1	1	1	1	1	1	1	1	1	1	1	1	1	1	1	1	1	0	0	1	1	0	0	0	0	2	0	1	1	0	0
0	0	0	0	0	0	2	1	1	1	1	1	1	1	2	0	1	1	1	1	1	1	1	1	1	1	1	1	1	1	1	1	1	1	1	1	0	0	1	1	0	0	0	0	2	0	1	1	0	0
0	1	0	0	0	3	2	2	2	0	2	0	2	0	2	0	2	0	2	0	2	0	2	0	2	0	2	0	2	0	2	0	2	0	2	0	2	0	2	0	2	0	0	0	3	0	1	1	0	0
0	1	0	0	0	3	1	1	1	1	1	1	1	1	2	0	1	1	1	1	2	0	2	0	2	0	2	0	2	0	2	0	2	0	1	1	2	0	0	0	2	0	2	0	3	0	1	1	0	0
0	0	0	0	1	0	1	2	0	0	1	1	1	1	2	0	0	0	1	1	0	0	1	1	2	0	0	0	1	1	1	1	0	0	1	1	2	0	1	1	1	1	3	0	3	0	1	1	0	0
0	0	0	0	0	0	1	0	2	0	1	1	0	0	2	0	1	1	1	1	1	1	2	0	2	0	1	1	0	0	0	0	1	1	0	0	1	1	0	0	0	0	1	1	0	0	0	0	1	1
1	0	1	1	0	1	1	1	1	1	0	0	1	1	0	0	0	0	1	1	1	1	2	0	0	0	0	0	1	1	1	1	1	1	1	1	0	0	1	1	0	0	1	1	2	0	0	0	1	1
0	1	2	0	2	2	1	0	1	1	0	0	2	0	2	0	2	0	2	0	1	1	2	0	2	0	2	0	2	0	2	0	2	0	1	1	0	0	1	1	0	0	0	0	0	0	1	1	1	1
0	0	0	1	0	1	1	1	1	1	1	1	0	0	1	1	1	1	2	0	1	1	1	1	0	0	0	0	1	1	1	1	1	1	2	0	2	0	0	0	0	0	1	1	1	1	1	1	1	1
1	1	0	0	0	0	1	1	1	1	1	1	2	0	2	0	2	0	0	0	2	0	0	0	2	0	1	1	1	1	1	1	1	1	1	1	0	0	1	1	1	1	1	1	1	1	1	1	1	1
0	0	0	0	1	1	1	1	0	0	1	1	1	1	1	1	1	1	1	1	2	0	1	1	1	1	0	0	2	0	1	1	1	1	0	0	1	1	1	1	0	0	2	0	1	1	1	1	1	1
3	0	1	1	1	1	0	1	1	1	1	1	1	1	0	0	2	0	1	1	1	1	1	1	1	1	1	1	1	1	1	1	2	0	1	1	2	0	1	1	0	0	2	0	1	1	1	1	1	1
2	1	1	1	2	1	1	0	0	0	1	1	1	1	0	0	1	1	1	1	1	1	1	1	1	1	1	1	0	0	0	0	2	0	2	0	0	0	2	0	0	0	2	0	1	1	1	1	1	1
1	1	1	0	1	1	1	0	1	1	0	0	0	0	0	0	0	0	0	0	2	0	0	0	0	0	1	1	0	0	0	0	0	0	0	0	1	1	0	0	1	1	2	0	1	1	1	1	1	1
2	0	1	1	1	0	1	1	1	1	1	1	1	1	0	0	1	1	1	1	1	1	2	0	0	0	2	0	2	0	2	0	0	0	1	1	1	1	1	1	1	1	2	0	1	1	1	1	1	1
0	1	0	0	0	4	0	1	1	1	1	1	1	1	0	0	1	1	1	1	0	0	1	1	1	1	1	1	1	1	1	1	1	1	1	1	1	1	1	1	1	1	2	0	1	1	1	1	1	1
0	1	1	1	2	1	1	0	0	0	1	1	1	1	0	0	1	1	1	1	1	1	1	1	1	1	1	1	0	0	2	0	2	0	2	0	0	0	0	0	2	0	1	1	2	0	1	1	1	1
0	0	0	0	1	5	2	1	1	1	1	1	1	1	1	1	1	1	0	0	1	1	1	1	1	1	0	0	1	1	1	1	1	1	1	1	1	1	1	1	1	1	2	0	3	0	1	1	1	1
2	0	1	1	2	0	2	1	1	1	1	1	1	1	2	0	2	0	1	1	0	0	0	0	1	1	1	1	1	1	2	0	2	0	2	0	2	0	2	0	2	0	3	0	3	0	1	1	1	1
0	1	0	0	1	0	1	1	1	1	0	0	1	1	0	0	0	0	1	1	2	0	1	1	1	1	1	1	1	1	2	0	0	0	1	1	1	1	0	0	0	0	2	0	1	1	2	0	1	1
1	0	1	1	1	0	1	0	1	1	1	1	1	1	0	0	1	1	0	0	1	1	1	1	1	1	0	0	1	1	1	1	2	0	2	0	0	0	0	0	2	0	1	1	3	0	2	0	1	1
0	1	0	0	0	3	1	1	1	1	0	0	1	1	1	1	2	0	1	1	0	0	1	1	1	1	0	0	1	1	2	0	0	0	1	1	2	0	0	0	0	0	0	0	0	0	1	1	2	0
1	0	0	0	1	0	0	1	1	1	2	0	1	1	2	0	1	1	1	1	0	0	1	1	1	1	2	0	1	1	1	1	1	1	2	0	2	0	1	1	0	0	1	1	1	1	1	1	2	0
0	0	0	0	0	0	2	1	1	1	1	1	1	1	2	0	1	1	1	1	2	0	1	1	1	1	1	1	1	1	1	1	2	0	1	1	2	0	2	0	0	0	2	0	1	1	1	1	2	0
0	1	0	0	0	3	1	1	0	0	2	0	2	0	2	0	0	0	1	1	1	1	1	1	1	1	1	1	1	1	1	1	1	1	1	1	1	1	1	1	1	1	2	0	1	1	1	1	2	0
0	1	0	0	1	0	2	1	1	1	1	1	1	1	2	0	1	1	1	1	2	0	1	1	1	1	1	1	1	1	1	1	1	1	1	1	0	0	1	1	2	0	2	0	3	0	1	1	2	0
2	1	2	0	1	2	2	1	2	0	2	0	0	0	1	1	0	0	2	0	0	0	0	0	0	0	2	0	0	0	0	0	0	0	2	0	2	0	1	1	1	1	3	0	3	0	2	0	2	0
0	1	0	0	0	3	2	1	0	0	2	0	2	0	2	0	2	0	2	0	2	0	1	1	2	0	2	0	1	1	2	0	2	0	2	0	2	0	2	0	2	0	3	0	3	0	2	0	2	0
1	0	1	0	1	2	2	0	1	1	1	1	2	0	2	0	1	1	1	1	1	1	1	1	1	1	1	1	1	1	1	1	1	1	1	1	0	0	1	1	0	0	0	0	0	0	1	1	0	0
2	1	1	1	1	1	0	0	2	0	1	1	2	0	1	1	0	0	2	0	2	0	0	0	2	0	1	1	2	0	0	0	2	0	2	0	1	1	0	0	1	1	0	0	0	0	1	1	0	0
0	0	0	1	3	2	0	1	0	0	1	1	2	0	1	1	1	1	1	1	2	0	2	0	0	0	0	0	1	1	1	1	1	1	0	0	2	0	0	0	1	1	0	0	0	0	1	1	0	0
1	1	0	0	1	3	2	1	1	1	1	1	1	1	2	0	1	1	1	1	2	0	1	1	1	1	0	0	1	1	1	1	1	1	1	1	2	0	1	1	0	0	2	0	0	0	1	1	0	0
4	0	1	1	2	1	1	1	1	1	1	1	1	1	1	1	0	0	0	0	0	0	1	1	1	1	1	1	1	1	1	1	1	1	1	1	1	1	1	1	1	1	2	0	0	0	1	1	0	0
0	1	0	1	1	0	1	1	1	1	1	1	1	1	1	1	2	0	2	0	0	0	1	1	1	1	1	1	1	1	1	1	1	1	2	0	2	0	2	0	2	0	2	0	0	0	1	1	0	0
2	1	1	1	3	1	1	1	1	1	1	1	1	1	0	0	0	0	1	1	1	1	1	1	1	1	1	1	1	1	1	1	1	1	1	1	0	0	1	1	0	0	2	0	1	1	1	1	0	0
0	0	0	0	0	0	1	2	0	0	0	0	1	1	1	1	0	0	0	0	0	0	1	1	1	1	1	1	0	0	0	0	0	0	1	1	1	1	1	1	0	0	2	0	1	1	1	1	0	0
4	0	1	1	2	1	1	0	1	1	1	1	1	1	0	0	1	1	1	1	1	1	1	1	1	1	1	1	1	1	1	1	1	1	1	1	1	1	1	1	0	0	2	0	1	1	1	1	0	0
1	0	1	1	1	0	1	1	0	0	1	1	1	1	0	0	1	1	1	1	1	1	1	1	0	0	2	0	1	1	2	0	2	0	2	0	1	1	1	1	0	0	2	0	1	1	1	1	0	0
0	1	0	0	0	0	2	0	1	1	1	1	1	1	1	1	2	0	1	1	2	0	1	1	1	1	1	1	1	1	1	1	1	1	1	1	2	0	1	1	0	0	2	0	1	1	1	1	0	0
2	0	2	1	1	1	2	1	1	1	1	1	1	1	0	0	1	1	1	1	1	1	1	1	1	1	2	0	2	0	1	1	1	1	1	1	1	1	1	1	1	1	2	0	1	1	1	1	0	0
0	1	0	0	1	3	0	1	2	0	1	1	1	1	1	1	1	1	1	1	1	1	2	0	2	0	1	1	1	1	1	1	1	1	1	1	0	0	2	0	1	1	3	0	1	1	1	1	0	0
2	0	2	0	1	3	1	1	1	1	1	1	0	0	2	0	0	0	0	0	2	0	0	0	0	0	0	0	2	0	0	0	2	0	0	0	1	1	0	0	2	0	1	1	2	0	1	1	0	0
0	0	0	1	1	1	1	0	1	1	1	1	2	0	2	0	2	0	0	0	2	0	1	1	1	1	0	0	1	1	1	1	2	0	1	1	2	0	2	0	0	0	3	0	3	0	1	1	0	0
2	0	0	0	0	0	1	1	0	0	1	1	1	1	0	0	1	1	1	1	1	1	1	1	1	1	1	1	1	1	1	1	1	1	1	1	0	0	1	1	0	0	0	0	3	0	0	0	1	1
1	1	0	0	1	3	1	1	0	0	0	0	1	1	0	0	1	1	1	1	1	1	1	1	1	1	0	0	0	0	0	0	1	1	1	1	0	0	1	1	0	0	2	0	0	0	1	1	1	1
1	0	0	1	1	4	1	0	1	1	1	1	2	0	2	0	2	0	1	1	1	1	1	1	2	0	1	1	1	1	1	1	1	1	1	1	0	0	1	1	0	0	0	0	1	1	1	1	1	1
1	0	1	0	2	1	1	1	1	1	2	0	2	0	0	0	0	0	1	1	1	1	1	1	1	1	1	1	1	1	1	1	1	1	1	1	0	0	1	1	0	0	1	1	1	1	1	1	1	1
2	0	1	1	1	1	1	0	1	1	1	1	1	1	1	1	0	0	0	0	0	0	1	1	1	1	1	1	1	1	1	1	1	1	0	0	1	1	1	1	0	0	2	0	1	1	1	1	1	1
0	0	0	1	1	0	1	1	0	0	0	0	0	0	1	1	0	0	0	0	2	0	2	0	2	0	2	0	2	0	2	0	1	1	1	1	1	1	1	1	0	0	2	0	1	1	1	1	1	1
1	1	1	1	1	3	2	1	0	0	1	1	1	1	2	0	2	0	1	1	1	1	1	1	1	1	1	1	1	1	1	1	1	1	0	0	0	0	1	1	1	1	2	0	1	1	1	1	1	1
2	0	1	1	3	1	2	1	1	1	1	1	1	1	1	1	1	1	1	1	2	0	1	1	1	1	1	1	1	1	1	1	1	1	1	1	0	0	1	1	2	0	2	0	1	1	1	1	1	1
4	1	1	1	2	1	0	1	1	1	1	1	1	1	0	0	0	0	0	0	1	1	1	1	1	1	1	1	1	1	1	1	1	1	1	1	2	0	1	1	0	0	1	1	3	0	1	1	1	1
0	0	0	0	0	0	0	0	0	0	0	0	1	1	1	1	1	1	0	0	0	0	1	1	1	1	2	0	2	0	2	0	1	1	0	0	1	1	1	1	1	1	0	0	1	1	2	0	1	1
0	0	2	1	0	3	1	1	1	1	1	1	1	1	1	1	2	0	2	0	0	0	1	1	2	0	1	1	1	1	1	1	1	1	0	0	0	0	0	0	0	0	1	1	2	0	0	0	2	0
0	0	0	1	1	0	1	1	0	0	1	1	1	1	0	0	1	1	1	1	1	1	1	1	1	1	1	1	1	1	1	1	1	1	1	1	0	0	1	1	0	0	1	1	0	0	1	1	2	0
0	0	0	0	0	0	1	1	2	0	1	1	2	0	1	1	2	0	2	0	0	0	1	1	1	1	0	0	1	1	1	1	1	1	0	0	2	0	2	0	1	1	2	0	0	0	1	1	2	0
4	0	1	1	2	1	1	1	1	1	1	1	1	1	0	0	1	1	1	1	1	1	1	1	1	1	1	1	1	1	1	1	1	1	1	1	1	1	1	1	1	1	2	0	1	1	1	1	2	0
0	1	0	0	0	0	1	2	0	0	2	0	0	0	0	0	2	0	1	1	1	1	2	0	0	0	2	0	1	1	0	0	0	0	2	0	0	0	1	1	2	0	2	0	2	0	1	1	2	0
1	0	1	1	3	0	2	1	1	1	1	1	1	1	0	0	1	1	1	1	1	1	1	1	2	0	0	0	1	1	1	1	1	1	1	1	0	0	1	1	0	0	3	0	3	0	1	1	2	0
1	0	0	0	1	0	2	1	1	1	2	0	1	1	2	0	2	0	1	1	2	0	2	0	2	0	2	0	2	0	2	0	2	0	2	0	2	0	1	1	0	0	1	1	0	0	0	0	0	0
3	0	1	1	1	5	2	1	0	0	1	1	2	0	0	0	2	0	2	0	2	0	1	1	1	1	1	1	2	0	1	1	1	1	1	1	2	0	2	0	0	0	1	1	0	0	1	1	0	0
2	1	1	1	1	1	2	1	1	1	2	0	1	1	2	0	0	0	0	0	2	0	1	1	1	1	2	0	1	1	1	1	1	1	2	0	2	0	1	1	0	0	2	0	0	0	1	1	0	0
0	0	0	0	1	0	1	1	1	1	1	1	1	1	2	0	2	0	2	0	2	0	0	0	1	1	2	0	2	0	1	1	1	1	2	0	2	0	2	0	0	0	2	0	0	0	1	1	0	0
1	1	1	0	1	0	2	2	0	0	1	1	1	1	2	0	2	0	2	0	2	0	1	1	1	1	1	1	1	1	2	0	1	1	2	0	2	0	0	0	1	1	3	0	0	0	1	1	0	0
2	0	0	1	2	0	0	0	1	1	1	1	1	1	1	1	1	1	1	1	2	0	1	1	1	1	1	1	0	0	2	0	1	1	1	1	1	1	0	0	0	0	1	1	1	1	1	1	0	0
0	1	0	0	1	3	0	2	0	0	2	0	0	0	2	0	0	0	1	1	0	0	1	1	2	0	2	0	0	0	1	1	1	1	1	1	0	0	2	0	0	0	2	0	1	1	1	1	0	0
0	0	0	0	1	0	1	1	1	1	1	1	1	1	2	0	2	0	2	0	2	0	0	0	1	1	2	0	1	1	1	1	1	1	2	0	2	0	2	0	0	0	2	0	1	1	1	1	0	0
1	0	0	1	1	3	1	1	2	0	2	0	1	1	0	0	1	1	1	1	0	0	2	0	2	0	2	0	2	0	2	0	2	0	2	0	2	0	2	0	2	0	3	0	1	1	1	1	0	0
0	1	0	0	0	0	1	1	1	1	1	1	1	1	1	1	1	1	1	1	1	1	1	1	1	1	0	0	1	1	1	1	1	1	1	1	0	0	2	0	0	0	1	1	2	0	1	1	0	0
0	0	0	0	1	1	1	1	1	1	1	1	2	0	2	0	2	0	2	0	0	0	2	0	1	1	1	1	1	1	2	0	2	0	2	0	2	0	2	0	2	0	3	0	3	0	1	1	0	0
1	0	0	1	1	1	1	1	1	1	1	1	2	0	0	0	0	0	2	0	1	1	1	1	1	1	1	1	1	1	2	0	1	1	1	1	1	1	1	1	0	0	3	0	1	1	1	1	1	1
0	1	0	0	1	0	1	1	1	1	0	0	1	1	1	1	2	0	2	0	2	0	1	1	1	1	0	0	2	0	1	1	1	1	1	1	1	1	2	0	2	0	2	0	1	1	1	1	2	0
4	0	1	1	2	1	0	1	1	1	1	1	1	1	0	0	1	1	1	1	1	1	1	1	1	1	1	1	1	1	1	1	1	1	1	1	2	0	1	1	0	0	1	1	3	0	1	1	2	0
0	1	0	0	1	3	2	0	1	1	1	1	0	0	1	1	1	1	1	1	2	0	2	0	2	0	2	0	2	0	2	0	2	0	1	1	2	0	2	0	2	0	3	0	1	1	2	0	2	0
0	0	0	0	1	0	1	0	2	0	1	1	1	1	2	0	0	0	0	0	0	0	1	1	0	0	2	0	2	0	0	0	1	1	1	1	2	0	1	1	2	0	3	0	3	0	0	0	0	0
0	1	0	0	1	3	2	1	0	0	1	1	2	0	2	0	2	0	2	0	0	0	1	1	1	1	1	1	1	1	2	0	2	0	2	0	1	1	1	1	0	0	0	0	1	1	1	1	0	0
1	1	2	0	2	1	1	1	1	1	1	1	0	0	2	0	2	0	2	0	2	0	2	0	2	0	2	0	2	0	2	0	2	0	2	0	2	0	2	0	2	0	1	1	2	0	1	1	0	0
2	1	1	1	1	1	0	1	0	0	1	1	1	1	2	0	1	1	1	1	2	0	1	1	1	1	1	1	1	1	1	1	1	1	2	0	0	0	1	1	2	0	3	0	3	0	1	1	0	0
2	0	1	1	2	5	1	0	1	1	0	0	2	0	0	0	1	1	0	0	0	0	0	0	0	0	2	0	0	0	0	0	1	1	2	0	0	0	2	0	2	0	2	0	1	1	0	0	1	1
0	0	0	0	0	1	2	0	1	1	1	1	1	1	1	1	2	0	0	0	0	0	1	1	1	1	1	1	1	1	0	0	1	1	1	1	0	0	1	1	0	0	2	0	1	1	1	1	1	1
0	0	0	1	1	0	2	2	1	1	2	0	1	1	2	0	2	0	2	0	2	0	2	0	2	0	2	0	2	0	2	0	2	0	2	0	2	0	2	0	2	0	3	0	2	0	1	1	1	1
3	1	3	1	1	3	2	2	1	1	1	1	2	0	0	0	2	0	2	0	2	0	1	1	1	1	1	1	1	1	1	1	1	1	1	1	2	0	1	1	0	0	3	0	3	0	1	1	1	1
0	0	0	0	0	0	1	0	1	1	2	0	2	0	2	0	0	0	1	1	2	0	0	0	1	1	1	1	2	0	0	0	0	0	0	0	1	1	0	0	1	1	2	0	0	0	2	0	1	1
0	1	3	1	1	2	1	1	1	1	1	1	1	1	2	0	1	1	1	1	2	0	1	1	2	0	2	0	2	0	2	0	2	0	2	0	2	0	2	0	2	0	1	1	1	1	1	1	2	0
1	0	1	1	1	3	1	1	1	1	1	1	0	0	2	0	1	1	1	1	1	1	1	1	1	1	2	0	1	1	1	1	1	1	1	1	2	0	2	0	0	0	2	0	1	1	1	1	2	0
0	1	0	0	1	3	1	1	1	1	2	0	2	0	2	0	2	0	2	0	2	0	2	0	2	0	2	0	2	0	2	0	2	0	2	0	2	0	2	0	2	0	3	0	3	0	1	1	2	0
0	0	0	0	2	1	1	1	0	0	0	0	1	1	1	1	1	1	2	0	1	1	0	0	1	1	0	0	0	0	1	1	1	1	0	0	1	1	0	0	0	0	0	0	1	1	0	0	0	0
0	1	0	0	0	0	2	1	1	1	1	1	1	1	0	0	1	1	0	0	1	1	1	1	1	1	1	1	1	1	1	1	1	1	1	1	1	1	0	0	1	1	2	0	0	0	1	1	0	0
2	1	1	1	1	1	0	1	1	1	1	1	1	1	0	0	0	0	0	0	0	0	1	1	1	1	1	1	2	0	1	1	1	1	1	1	0	0	1	1	0	0	1	1	1	1	1	1	0	0
3	0	0	1	3	1	1	1	1	1	0	0	1	1	1	1	2	0	1	1	0	0	1	1	1	1	1	1	1	1	1	1	1	1	1	1	2	0	1	1	0	0	1	1	1	1	1	1	0	0
1	0	1	0	2	4	1	1	1	1	0	0	2	0	2	0	2	0	2	0	2	0	2	0	2	0	2	0	2	0	0	0	0	0	2	0	2	0	1	1	1	1	1	1	1	1	1	1	0	0
0	0	0	0	0	0	0	1	1	1	1	1	2	0	2	0	1	1	2	0	1	1	1	1	1	1	1	1	0	0	0	0	0	0	1	1	2	0	0	0	0	0	3	0	2	0	1	1	0	0
0	0	0	0	0	1	1	1	1	1	2	0	2	0	0	0	2	0	1	1	2	0	1	1	1	1	1	1	2	0	1	1	1	1	1	1	2	0	2	0	2	0	3	0	3	0	1	1	0	0
0	1	1	0	0	5	1	1	1	1	1	1	1	1	0	0	1	1	1	1	1	1	1	1	1	1	1	1	2	0	2	0	2	0	2	0	0	0	0	0	0	0	0	0	0	0	1	1	1	1
1	1	1	1	1	3	2	0	1	1	0	0	1	1	0	0	0	0	0	0	0	0	1	1	1	1	1	1	2	0	2	0	1	1	1	1	1	1	2	0	2	0	2	0	0	0	1	1	1	1
2	1	1	1	1	1	0	2	1	1	1	1	1	1	0	0	0	0	0	0	2	0	1	1	2	0	1	1	2	0	1	1	1	1	1	1	0	0	1	1	0	0	1	1	1	1	1	1	1	1
0	0	0	0	1	0	1	1	1	1	1	1	1	1	0	0	2	0	2	0	2	0	1	1	1	1	2	0	2	0	2	0	2	0	1	1	2	0	2	0	2	0	2	0	1	1	1	1	1	1
0	0	2	0	2	1	1	1	1	1	1	1	2	0	1	1	0	0	0	0	0	0	1	1	2	0	2	0	2	0	2	0	2	0	2	0	2	0	2	0	2	0	1	1	2	0	1	1	1	1
2	1	1	1	1	0	2	1	1	1	1	1	1	1	2	0	2	0	2	0	2	0	1	1	1	1	1	1	1	1	1	1	1	1	1	1	2	0	2	0	2	0	2	0	3	0	1	1	1	1
2	0	1	1	1	1	2	1	1	1	1	1	2	0	2	0	1	1	2	0	2	0	1	1	1	1	2	0	1	1	1	1	1	1	1	1	2	0	1	1	0	0	3	0	3	0	1	1	1	1
0	0	0	0	0	5	0	1	1	1	0	0	0	0	0	0	0	0	1	1	2	0	2	0	1	1	2	0	0	0	0	0	1	1	0	0	0	0	2	0	1	1	3	0	3	0	1	1	1	1
3	0	0	1	2	1	2	0	1	1	1	1	2	0	1	1	1	1	2	0	2	0	2	0	1	1	2	0	2	0	2	0	2	0	2	0	2	0	2	0	2	0	3	0	3	0	1	1	1	1
2	1	1	1	3	1	2	2	1	1	1	1	2	0	0	0	0	0	0	0	2	0	1	1	1	1	1	1	1	1	1	1	1	1	1	1	2	0	1	1	2	0	3	0	1	1	1	1	2	0
1	1	1	0	2	1	1	0	1	1	2	0	1	1	1	1	0	0	2	0	2	0	0	0	2	0	2	0	0	0	2	0	0	0	0	0	1	1	2	0	1	1	2	0	2	0	1	1	2	0
3	0	1	1	1	1	2	1	2	0	1	1	1	1	2	0	2	0	2	0	2	0	1	1	1	1	2	0	1	1	1	1	1	1	1	1	0	0	2	0	0	0	2	0	3	0	1	1	2	0
1	1	2	0	0	1	1	2	1	1	1	1	0	0	2	0	1	1	2	0	2	0	0	0	2	0	2	0	2	0	2	0	2	0	2	0	2	0	2	0	1	1	3	0	3	0	1	1	2	0
0	0	0	1	0	3	2	2	2	0	2	0	2	0	2	0	2	0	2	0	2	0	2	0	2	0	2	0	2	0	2	0	2	0	2	0	2	0	2	0	2	0	1	1	1	1	2	0	2	0
4	0	2	1	2	1	2	2	1	1	1	1	2	0	2	0	2	0	2	0	1	1	1	1	1	1	1	1	1	1	1	1	1	1	1	1	2	0	1	1	0	0	2	0	1	1	2	0	2	0
0	1	0	1	1	0	2	2	1	1	2	0	1	1	1	1	2	0	1	1	1	1	2	0	1	1	1	1	1	1	1	1	1	1	1	1	2	0	1	1	2	0	3	0	3	0	2	0	2	0
0	0	0	0	0	0	1	1	1	1	2	0	1	1	1	1	2	0	2	0	2	0	1	1	1	1	0	0	2	0	2	0	2	0	2	0	2	0	2	0	2	0	1	1	0	0	1	1	0	0
1	0	0	1	1	5	2	1	0	0	0	0	0	0	1	1	1	1	1	1	2	0	1	1	1	1	2	0	1	1	1	1	1	1	0	0	1	1	2	0	2	0	2	0	0	0	1	1	0	0
0	1	0	1	1	0	2	1	1	1	1	1	2	0	2	0	1	1	1	1	2	0	1	1	1	1	2	0	1	1	2	0	2	0	1	1	2	0	2	0	2	0	2	0	0	0	1	1	0	0
1	1	1	0	1	3	0	2	1	1	1	1	1	1	0	0	2	0	2	0	2	0	1	1	1	1	2	0	2	0	2	0	2	0	2	0	2	0	2	0	2	0	2	0	0	0	1	1	0	0
1	1	1	0	1	3	2	1	1	1	1	1	1	1	0	0	0	0	1	1	2	0	1	1	1	1	0	0	1	1	1	1	0	0	1	1	2	0	1	1	1	1	0	0	1	1	1	1	0	0
3	1	3	0	1	5	1	2	1	1	2	0	0	0	1	1	2	0	2	0	0	0	2	0	2	0	2	0	0	0	2	0	0	0	1	1	2	0	2	0	2	0	0	0	1	1	1	1	0	0
2	1	1	1	1	0	2	1	1	1	1	1	1	1	2	0	1	1	1	1	1	1	1	1	2	0	2	0	2	0	1	1	1	1	2	0	2	0	2	0	0	0	1	1	1	1	1	1	0	0
2	1	1	1	1	3	2	1	1	1	1	1	2	0	1	1	2	0	2	0	0	0	1	1	1	1	1	1	1	1	2	0	1	1	1	1	2	0	0	0	1	1	1	1	1	1	1	1	0	0
1	0	0	1	1	0	1	1	1	1	1	1	2	0	2	0	1	1	2	0	1	1	2	0	1	1	0	0	2	0	2	0	1	1	1	1	1	1	0	0	0	0	2	0	1	1	1	1	0	0
2	1	1	1	1	3	2	1	1	1	0	0	1	1	1	1	0	0	0	0	0	0	1	1	1	1	1	1	1	1	1	1	1	1	1	1	2	0	2	0	0	0	2	0	1	1	1	1	0	0
1	1	1	1	1	3	0	1	0	0	1	1	1	1	2	0	2	0	2	0	2	0	1	1	1	1	1	1	2	0	2	0	2	0	2	0	2	0	2	0	2	0	2	0	1	1	1	1	0	0
0	1	0	0	0	3	1	1	0	0	1	1	2	0	0	0	2	0	2	0	1	1	1	1	1	1	1	1	1	1	1	1	1	1	1	1	0	0	1	1	0	0	0	0	2	0	1	1	0	0
0	0	0	0	0	0	2	1	1	1	1	1	1	1	0	0	1	1	1	1	2	0	1	1	1	1	1	1	1	1	1	1	1	1	2	0	2	0	2	0	0	0	3	0	3	0	1	1	0	0
3	0	1	1	2	1	2	1	1	1	1	1	1	1	2	0	0	0	2	0	2	0	1	1	2	0	2	0	2	0	2	0	1	1	1	1	0	0	2	0	2	0	3	0	3	0	1	1	0	0
1	0	0	1	1	0	2	1	0	0	1	1	1	1	2	0	1	1	1	1	2	0	1	1	1	1	2	0	1	1	1	1	1	1	2	0	2	0	2	0	2	0	3	0	3	0	1	1	0	0
1	1	0	0	1	3	2	1	1	1	1	1	1	1	1	1	1	1	1	1	0	0	2	0	1	1	0	0	1	1	1	1	1	1	2	0	2	0	1	1	2	0	2	0	1	1	2	0	0	0
0	0	0	1	0	1	2	2	2	0	2	0	1	1	1	1	1	1	1	1	2	0	2	0	1	1	1	1	2	0	1	1	0	0	1	1	0	0	1	1	0	0	1	1	0	0	1	1	1	1
3	0	1	1	3	1	2	1	1	1	1	1	0	0	1	1	2	0	1	1	1	1	1	1	1	1	1	1	1	1	1	1	1	1	1	1	0	0	1	1	0	0	2	0	0	0	1	1	1	1
0	0	2	0	2	2	0	0	0	0	0	0	2	0	2	0	1	1	2	0	2	0	0	0	0	0	1	1	1	1	1	1	0	0	0	0	1	1	0	0	0	0	0	0	1	1	1	1	1	1
1	1	1	1	0	0	1	1	1	1	0	0	2	0	2	0	2	0	2	0	0	0	2	0	1	1	2	0	2	0	1	1	0	0	1	1	2	0	1	1	0	0	1	1	1	1	1	1	1	1
1	0	1	0	2	3	1	1	1	1	2	0	2	0	1	1	2	0	0	0	1	1	0	0	1	1	1	1	1	1	1	1	1	1	1	1	1	1	1	1	1	1	1	1	1	1	1	1	1	1
3	1	1	1	1	5	1	1	1	1	1	1	2	0	1	1	1	1	1	1	2	0	2	0	1	1	2	0	1	1	1	1	1	1	1	1	2	0	2	0	0	0	2	0	1	1	1	1	1	1
3	1	1	1	1	4	1	1	1	1	1	1	1	1	0	0	2	0	0	0	2	0	0	0	2	0	2	0	2	0	2	0	2	0	2	0	2	0	2	0	0	0	2	0	1	1	1	1	1	1
3	0	1	1	1	1	1	1	1	1	0	0	1	1	0	0	2	0	0	0	2	0	1	1	1	1	1	1	1	1	1	1	1	1	1	1	1	1	1	1	0	0	3	0	1	1	1	1	1	1
2	0	1	0	1	1	1	1	1	1	0	0	0	0	0	0	0	0	2	0	2	0	1	1	0	0	1	1	2	0	2	0	1	1	1	1	2	0	1	1	0	0	0	0	2	0	1	1	1	1
1	0	1	0	2	2	1	1	1	1	0	0	2	0	2	0	2	0	2	0	0	0	0	0	0	0	0	0	0	0	2	0	0	0	0	0	2	0	2	0	1	1	3	0	2	0	1	1	1	1
0	1	0	0	0	3	0	0	1	1	2	0	2	0	1	1	2	0	2	0	2	0	2	0	2	0	0	0	0	0	0	0	0	0	1	1	2	0	2	0	2	0	2	0	3	0	1	1	1	1
1	0	0	1	1	3	2	1	1	1	2	0	1	1	2	0	2	0	2	0	2	0	2	0	2	0	2	0	2	0	2	0	2	0	2	0	2	0	2	0	2	0	3	0	3	0	1	1	1	1
0	0	0	0	1	0	2	1	1	1	1	1	1	1	0	0	1	1	1	1	2	0	2	0	1	1	1	1	1	1	1	1	1	1	1	1	0	0	1	1	0	0	2	0	0	0	2	0	1	1
3	0	1	1	2	1	1	1	1	1	1	1	1	1	2	0	2	0	1	1	2	0	1	1	2	0	1	1	1	1	2	0	1	1	2	0	2	0	1	1	2	0	2	0	3	0	2	0	1	1
1	1	3	1	0	2	1	0	2	0	0	0	2	0	2	0	2	0	2	0	2	0	2	0	2	0	0	0	0	0	2	0	0	0	2	0	0	0	0	0	1	1	3	0	3	0	2	0	1	1
2	1	3	0	2	2	2	1	1	1	0	0	2	0	2	0	1	1	0	0	2	0	2	0	2	0	2	0	2	0	2	0	2	0	2	0	2	0	2	0	2	0	3	0	3	0	0	0	2	0
0	0	0	0	0	0	2	2	2	0	2	0	2	0	2	0	2	0	2	0	2	0	2	0	2	0	2	0	2	0	2	0	2	0	2	0	2	0	2	0	2	0	3	0	3	0	0	0	2	0
2	0	1	1	1	5	1	2	2	0	2	0	2	0	2	0	2	0	2	0	2	0	2	0	2	0	2	0	2	0	2	0	2	0	2	0	2	0	2	0	2	0	3	0	3	0	0	0	2	0
0	1	0	0	0	0	1	1	1	1	0	0	1	1	0	0	0	0	1	1	0	0	1	1	1	1	1	1	1	1	1	1	1	1	1	1	1	1	0	0	0	0	0	0	0	0	1	1	2	0
2	1	2	1	2	2	2	1	0	0	1	1	1	1	0	0	1	1	1	1	1	1	1	1	1	1	1	1	1	1	1	1	1	1	1	1	0	0	1	1	0	0	0	0	0	0	1	1	2	0
4	0	1	1	3	1	2	1	1	1	2	0	1	1	0	0	1	1	1	1	1	1	1	1	1	1	1	1	1	1	1	1	1	1	1	1	0	0	1	1	0	0	0	0	0	0	1	1	2	0
0	1	0	0	0	0	2	1	1	1	2	0	2	0	0	0	1	1	1	1	1	1	1	1	1	1	2	0	2	0	1	1	1	1	1	1	2	0	2	0	1	1	0	0	0	0	1	1	2	0
1	0	0	0	0	0	2	1	1	1	1	1	1	1	2	0	1	1	2	0	2	0	1	1	1	1	1	1	1	1	2	0	1	1	2	0	2	0	1	1	0	0	2	0	0	0	1	1	2	0
0	1	0	0	1	3	2	1	1	1	1	1	1	1	0	0	0	0	1	1	0	0	1	1	1	1	0	0	0	0	0	0	1	1	1	1	1	1	0	0	1	1	2	0	0	0	1	1	2	0
0	0	0	0	0	1	1	0	1	1	0	0	1	1	1	1	0	0	1	1	1	1	1	1	1	1	1	1	1	1	1	1	1	1	0	0	1	1	1	1	1	1	2	0	0	0	1	1	2	0
0	1	0	0	0	3	2	2	1	1	0	0	1	1	0	0	2	0	2	0	2	0	1	1	1	1	1	1	1	1	2	0	2	0	2	0	2	0	2	0	2	0	2	0	0	0	1	1	2	0
1	1	1	1	1	3	2	1	1	1	1	1	2	0	2	0	2	0	2	0	1	1	1	1	1	1	1	1	2	0	1	1	1	1	2	0	2	0	1	1	1	1	3	0	0	0	1	1	2	0
2	0	1	1	2	1	2	1	2	0	2	0	1	1	0	0	2	0	1	1	1	1	1	1	1	1	1	1	1	1	1	1	1	1	1	1	0	0	1	1	0	0	1	1	1	1	1	1	2	0
2	1	1	0	1	3	1	1	1	1	0	0	2	0	1	1	2	0	2	0	2	0	2	0	2	0	2	0	2	0	2	0	2	0	2	0	1	1	2	0	1	1	1	1	1	1	1	1	2	0
1	1	1	0	1	3	1	1	1	1	1	1	1	1	1	1	1	1	1	1	1	1	1	1	1	1	2	0	1	1	1	1	1	1	1	1	2	0	2	0	2	0	1	1	1	1	1	1	2	0
2	0	0	0	1	1	1	1	1	1	2	0	2	0	2	0	0	0	2	0	0	0	1	1	1	1	1	1	1	1	1	1	1	1	1	1	1	1	0	0	0	0	2	0	1	1	1	1	2	0
2	0	0	1	2	0	2	1	1	1	1	1	1	1	2	0	1	1	1	1	2	0	1	1	1	1	1	1	1	1	1	1	1	1	1	1	0	0	1	1	0	0	2	0	1	1	1	1	2	0
0	1	0	0	0	1	1	1	1	1	1	1	1	1	1	1	1	1	2	0	0	0	1	1	1	1	2	0	1	1	2	0	2	0	1	1	2	0	1	1	0	0	2	0	1	1	1	1	2	0
2	0	1	1	3	1	2	1	1	1	1	1	1	1	1	1	1	1	1	1	2	0	1	1	1	1	1	1	1	1	1	1	1	1	1	1	2	0	2	0	0	0	2	0	1	1	1	1	2	0
0	0	0	0	0	3	2	1	1	1	1	1	2	0	2	0	2	0	2	0	2	0	1	1	1	1	1	1	1	1	2	0	1	1	2	0	2	0	2	0	0	0	2	0	1	1	1	1	2	0
0	0	0	0	0	0	2	1	1	1	1	1	2	0	2	0	2	0	2	0	2	0	1	1	1	1	1	1	1	1	2	0	2	0	2	0	2	0	2	0	0	0	2	0	1	1	1	1	2	0
0	1	0	0	1	3	0	1	0	0	2	0	1	1	1	1	1	1	1	1	2	0	1	1	1	1	0	0	0	0	0	0	1	1	0	0	0	0	0	0	1	1	2	0	1	1	1	1	2	0
0	1	3	0	0	0	1	1	1	1	1	1	0	0	2	0	1	1	1	1	2	0	1	1	2	0	1	1	1	1	2	0	1	1	2	0	2	0	1	1	1	1	2	0	1	1	1	1	2	0
3	0	1	1	1	1	1	1	0	0	1	1	1	1	1	1	1	1	1	1	2	0	1	1	1	1	2	0	1	1	1	1	2	0	1	1	2	0	1	1	2	0	2	0	1	1	1	1	2	0
2	0	0	1	1	1	2	0	1	1	1	1	1	1	0	0	1	1	1	1	1	1	2	0	1	1	1	1	1	1	1	1	2	0	2	0	2	0	1	1	2	0	2	0	1	1	1	1	2	0
0	1	0	0	0	3	1	1	1	1	1	1	2	0	1	1	1	1	1	1	2	0	0	0	2	0	2	0	1	1	2	0	1	1	1	1	2	0	2	0	2	0	2	0	1	1	1	1	2	0
0	1	0	0	0	0	2	1	1	1	1	1	2	0	2	0	2	0	2	0	2	0	2	0	1	1	1	1	1	1	2	0	1	1	2	0	2	0	2	0	2	0	2	0	1	1	1	1	2	0
3	0	0	0	1	2	1	1	1	1	1	1	2	0	1	1	0	0	1	1	1	1	1	1	1	1	1	1	1	1	1	1	1	1	2	0	0	0	0	0	0	0	1	1	2	0	1	1	2	0
2	0	2	1	1	2	1	2	1	1	2	0	2	0	2	0	2	0	0	0	1	1	0	0	0	0	0	0	2	0	1	1	0	0	0	0	1	1	0	0	2	0	1	1	2	0	1	1	2	0
1	1	2	1	0	4	1	1	1	1	2	0	0	0	2	0	2	0	0	0	2	0	2	0	1	1	1	1	2	0	0	0	2	0	0	0	0	0	1	1	0	0	3	0	2	0	1	1	2	0
0	0	0	0	1	2	1	1	1	1	1	1	2	0	0	0	1	1	1	1	2	0	2	0	1	1	0	0	2	0	1	1	0	0	2	0	0	0	0	0	0	0	2	0	3	0	1	1	2	0
3	0	1	1	2	1	2	1	1	1	1	1	1	1	2	0	2	0	2	0	2	0	1	1	1	1	1	1	2	0	1	1	1	1	1	1	2	0	1	1	0	0	2	0	3	0	1	1	2	0
0	1	0	0	0	3	2	2	1	1	2	0	2	0	0	0	0	0	0	0	2	0	1	1	1	1	2	0	2	0	2	0	2	0	2	0	2	0	0	0	2	0	2	0	3	0	1	1	2	0
1	1	2	1	1	1	2	1	1	1	2	0	0	0	0	0	0	0	1	1	0	0	1	1	2	0	1	1	2	0	2	0	2	0	0	0	2	0	1	1	2	0	2	0	3	0	1	1	2	0
4	0	1	1	3	1	1	1	1	1	1	1	1	1	1	1	0	0	1	1	2	0	1	1	1	1	2	0	1	1	1	1	1	1	2	0	2	0	1	1	2	0	2	0	3	0	1	1	2	0
0	1	0	0	1	2	1	2	2	0	2	0	2	0	0	0	2	0	2	0	2	0	2	0	2	0	2	0	2	0	2	0	2	0	2	0	2	0	2	0	2	0	2	0	3	0	1	1	2	0
1	0	1	1	1	2	2	1	1	1	1	1	1	1	2	0	1	1	2	0	2	0	1	1	1	1	1	1	1	1	1	1	1	1	1	1	0	0	1	1	0	0	3	0	3	0	1	1	2	0
2	0	1	1	1	1	2	1	1	1	1	1	1	1	0	0	1	1	1	1	2	0	2	0	1	1	2	0	1	1	1	1	1	1	1	1	0	0	2	0	0	0	3	0	3	0	1	1	2	0
0	1	0	0	0	3	1	1	2	0	0	0	2	0	2	0	1	1	1	1	2	0	1	1	1	1	1	1	1	1	1	1	1	1	2	0	2	0	2	0	0	0	3	0	3	0	1	1	2	0
3	1	1	1	1	1	0	2	2	0	2	0	2	0	2	0	2	0	2	0	2	0	2	0	1	1	2	0	1	1	1	1	1	1	2	0	2	0	2	0	0	0	3	0	3	0	1	1	2	0
0	1	0	0	0	3	1	1	1	1	0	0	1	1	0	0	2	0	1	1	1	1	0	0	0	0	0	0	0	0	2	0	2	0	1	1	2	0	0	0	2	0	3	0	3	0	1	1	2	0
2	1	0	1	1	1	2	1	1	1	1	1	1	1	2	0	0	0	2	0	2	0	1	1	1	1	2	0	1	1	1	1	2	0	2	0	2	0	1	1	2	0	3	0	3	0	1	1	2	0
2	0	1	1	1	1	2	1	0	0	2	0	2	0	1	1	1	1	1	1	2	0	1	1	1	1	1	1	1	1	1	1	1	1	0	0	1	1	2	0	2	0	3	0	3	0	1	1	2	0
0	1	1	0	0	3	2	1	1	1	1	1	1	1	2	0	1	1	2	0	2	0	2	0	1	1	1	1	2	0	2	0	2	0	0	0	2	0	2	0	2	0	3	0	3	0	1	1	2	0
1	1	2	0	1	3	2	1	0	0	1	1	1	1	2	0	1	1	1	1	2	0	1	1	1	1	1	1	1	1	1	1	1	1	1	1	2	0	2	0	2	0	3	0	3	0	1	1	2	0
1	1	1	1	1	1	2	1	1	1	2	0	2	0	2	0	2	0	2	0	1	1	1	1	1	1	1	1	2	0	1	1	2	0	1	1	2	0	2	0	2	0	3	0	3	0	1	1	2	0
0	1	0	0	1	3	2	1	1	1	1	1	1	1	2	0	1	1	2	0	2	0	1	1	1	1	2	0	2	0	2	0	2	0	1	1	2	0	2	0	2	0	3	0	3	0	1	1	2	0
0	1	0	0	0	3	2	1	1	1	1	1	2	0	1	1	1	1	1	1	2	0	2	0	2	0	2	0	2	0	2	0	2	0	1	1	2	0	2	0	2	0	3	0	3	0	1	1	2	0
2	0	1	1	2	1	2	1	1	1	1	1	1	1	1	1	1	1	2	0	2	0	1	1	1	1	1	1	1	1	1	1	1	1	2	0	2	0	2	0	2	0	3	0	3	0	1	1	2	0
1	1	1	1	1	3	2	1	1	1	2	0	1	1	2	0	2	0	2	0	2	0	1	1	2	0	1	1	2	0	2	0	1	1	2	0	2	0	2	0	2	0	3	0	3	0	1	1	2	0
0	1	0	0	0	4	2	1	1	1	2	0	1	1	1	1	1	1	0	0	1	1	2	0	0	0	1	1	0	0	0	0	2	0	2	0	2	0	2	0	2	0	3	0	3	0	1	1	2	0
2	1	1	1	1	3	2	1	1	1	2	0	1	1	2	0	2	0	2	0	2	0	1	1	1	1	1	1	2	0	1	1	2	0	2	0	2	0	2	0	2	0	3	0	3	0	1	1	2	0
2	0	1	1	2	1	2	1	1	1	2	0	2	0	2	0	2	0	2	0	2	0	1	1	1	1	2	0	1	1	2	0	2	0	2	0	2	0	2	0	2	0	3	0	3	0	1	1	2	0
2	0	0	1	1	1	2	1	1	1	1	1	2	0	1	1	2	0	2	0	2	0	2	0	1	1	2	0	1	1	2	0	2	0	2	0	2	0	2	0	2	0	3	0	3	0	1	1	2	0
2	0	1	1	1	0	2	1	1	1	2	0	2	0	2	0	1	1	1	1	2	0	1	1	1	1	1	1	2	0	2	0	2	0	2	0	2	0	2	0	2	0	3	0	3	0	1	1	2	0
1	1	1	1	1	3	2	1	1	1	1	1	1	1	2	0	1	1	2	0	2	0	1	1	1	1	1	1	2	0	2	0	2	0	2	0	2	0	2	0	2	0	3	0	3	0	1	1	2	0
2	1	2	1	1	3	2	1	1	1	2	0	1	1	2	0	2	0	2	0	2	0	1	1	2	0	1	1	2	0	2	0	2	0	2	0	2	0	2	0	2	0	3	0	3	0	1	1	2	0
0	0	0	0	0	1	1	1	1	1	1	1	2	0	1	1	1	1	1	1	2	0	1	1	1	1	2	0	2	0	2	0	2	0	2	0	2	0	2	0	2	0	3	0	3	0	1	1	2	0
0	1	0	0	0	3	1	1	1	1	1	1	2	0	2	0	1	1	2	0	2	0	1	1	1	1	2	0	2	0	2	0	2	0	2	0	2	0	2	0	2	0	3	0	3	0	1	1	2	0
0	1	0	0	0	0	2	1	1	1	1	1	1	1	2	0	2	0	2	0	2	0	1	1	1	1	2	0	2	0	2	0	2	0	2	0	2	0	2	0	2	0	3	0	3	0	1	1	2	0
0	1	1	0	0	0	2	1	1	1	1	1	1	1	2	0	2	0	2	0	2	0	1	1	1	1	2	0	2	0	2	0	2	0	2	0	2	0	2	0	2	0	3	0	3	0	1	1	2	0
0	1	0	1	0	4	2	1	1	1	1	1	1	1	2	0	2	0	2	0	2	0	1	1	1	1	2	0	2	0	2	0	2	0	2	0	2	0	2	0	2	0	3	0	3	0	1	1	2	0
0	1	1	1	1	1	2	1	1	1	1	1	1	1	2	0	2	0	2	0	2	0	1	1	1	1	2	0	2	0	2	0	2	0	2	0	2	0	2	0	2	0	3	0	3	0	1	1	2	0
2	1	2	1	1	1	2	1	1	1	1	1	1	1	2	0	2	0	2	0	2	0	1	1	1	1	2	0	2	0	2	0	2	0	2	0	2	0	2	0	2	0	3	0	3	0	1	1	2	0
1	1	1	1	1	3	2	1	1	1	2	0	1	1	2	0	2	0	2	0	2	0	1	1	1	1	2	0	2	0	2	0	2	0	2	0	2	0	2	0	2	0	3	0	3	0	1	1	2	0
0	0	1	0	0	0	0	1	1	1	2	0	2	0	2	0	1	1	1	1	2	0	2	0	1	1	2	0	2	0	2	0	2	0	2	0	2	0	2	0	2	0	3	0	3	0	1	1	2	0
2	1	1	1	3	1	2	1	1	1	1	1	2	0	2	0	2	0	2	0	2	0	2	0	1	1	2	0	2	0	2	0	2	0	2	0	2	0	2	0	2	0	3	0	3	0	1	1	2	0
1	1	0	0	0	3	2	1	2	0	2	0	1	1	2	0	2	0	2	0	1	1	1	1	2	0	2	0	2	0	2	0	2	0	2	0	2	0	2	0	2	0	3	0	3	0	1	1	2	0
2	1	1	1	1	3	2	1	1	1	2	0	1	1	2	0	2	0	1	1	2	0	1	1	2	0	2	0	2	0	2	0	2	0	2	0	2	0	2	0	2	0	3	0	3	0	1	1	2	0
0	1	1	0	0	5	2	1	1	1	1	1	1	1	2	0	2	0	2	0	2	0	1	1	2	0	2	0	2	0	2	0	2	0	2	0	2	0	2	0	2	0	3	0	3	0	1	1	2	0
0	0	2	1	1	0	1	1	1	1	0	0	1	1	1	1	2	0	2	0	0	0	2	0	2	0	2	0	2	0	2	0	2	0	2	0	2	0	2	0	2	0	3	0	3	0	1	1	2	0
0	1	1	0	0	0	2	2	2	0	2	0	2	0	2	0	2	0	2	0	2	0	2	0	2	0	2	0	2	0	2	0	2	0	2	0	2	0	2	0	2	0	3	0	3	0	1	1	2	0
2	0	2	0	0	1	2	2	2	0	2	0	2	0	2	0	2	0	2	0	2	0	2	0	2	0	2	0	2	0	2	0	2	0	2	0	2	0	2	0	2	0	3	0	3	0	1	1	2	0
0	1	0	0	0	3	2	1	2	0	2	0	2	0	2	0	2	0	2	0	2	0	2	0	2	0	2	0	2	0	2	0	2	0	2	0	2	0	2	0	2	0	3	0	3	0	1	1	2	0
0	1	0	0	1	3	2	2	2	0	2	0	2	0	2	0	2	0	2	0	2	0	2	0	2	0	2	0	2	0	2	0	2	0	2	0	2	0	2	0	2	0	3	0	3	0	1	1	2	0
0	1	0	0	0	0	2	1	1	1	2	0	2	0	2	0	2	0	2	0	2	0	2	0	2	0	2	0	2	0	2	0	2	0	2	0	2	0	2	0	2	0	3	0	3	0	1	1	2	0
0	1	0	1	0	0	2	1	1	1	2	0	2	0	2	0	2	0	2	0	2	0	2	0	2	0	2	0	2	0	2	0	2	0	2	0	2	0	2	0	2	0	3	0	3	0	1	1	2	0
0	1	0	0	0	3	2	1	0	0	0	0	1	1	2	0	2	0	2	0	2	0	2	0	2	0	2	0	2	0	2	0	2	0	2	0	2	0	2	0	2	0	3	0	3	0	1	1	2	0
0	1	0	1	0	1	2	1	1	1	1	1	1	1	2	0	2	0	2	0	2	0	2	0	2	0	2	0	2	0	2	0	2	0	2	0	2	0	2	0	2	0	3	0	3	0	1	1	2	0
0	1	0	0	0	0	2	1	1	1	1	1	1	1	2	0	2	0	2	0	2	0	2	0	2	0	2	0	2	0	2	0	2	0	2	0	2	0	2	0	2	0	3	0	3	0	1	1	2	0
0	1	0	1	0	0	2	1	1	1	1	1	1	1	2	0	2	0	2	0	2	0	2	0	2	0	2	0	2	0	2	0	2	0	2	0	2	0	2	0	2	0	3	0	3	0	1	1	2	0
0	1	0	1	0	0	2	1	1	1	1	1	1	1	2	0	2	0	2	0	2	0	2	0	2	0	2	0	2	0	2	0	2	0	2	0	2	0	2	0	2	0	3	0	3	0	1	1	2	0
0	1	1	0	0	0	2	1	1	1	1	1	1	1	2	0	2	0	2	0	2	0	2	0	2	0	2	0	2	0	2	0	2	0	2	0	2	0	2	0	2	0	3	0	3	0	1	1	2	0
0	1	0	0	0	0	2	1	1	1	1	1	1	1	2	0	2	0	2	0	2	0	2	0	2	0	2	0	2	0	2	0	2	0	2	0	2	0	2	0	2	0	3	0	3	0	1	1	2	0
0	1	0	1	1	0	2	1	1	1	1	1	1	1	2	0	2	0	2	0	2	0	2	0	2	0	2	0	2	0	2	0	2	0	2	0	2	0	2	0	2	0	3	0	3	0	1	1	2	0
0	0	0	0	1	0	2	2	0	0	1	1	1	1	1	1	1	1	1	1	1	1	1	1	2	0	1	1	2	0	2	0	1	1	1	1	1	1	1	1	0	0	1	1	0	0	2	0	2	0
0	1	0	0	0	3	2	2	2	0	1	1	1	1	0	0	2	0	1	1	1	1	1	1	2	0	2	0	2	0	2	0	2	0	2	0	2	0	2	0	2	0	2	0	1	1	2	0	2	0
1	1	0	1	2	3	1	2	2	0	2	0	2	0	1	1	2	0	2	0	2	0	2	0	1	1	2	0	2	0	2	0	2	0	1	1	2	0	2	0	2	0	0	0	3	0	2	0	2	0
3	1	1	1	1	0	2	2	2	0	2	0	2	0	2	0	2	0	1	1	2	0	2	0	2	0	2	0	2	0	2	0	2	0	2	0	2	0	2	0	2	0	1	1	3	0	2	0	2	0
0	1	0	0	0	3	2	1	1	1	0	0	2	0	1	1	1	1	2	0	1	1	0	0	1	1	0	0	2	0	2	0	0	0	1	1	2	0	0	0	0	0	3	0	3	0	2	0	2	0
1	1	1	1	2	5	2	2	2	0	0	0	2	0	2	0	0	0	0	0	0	0	2	0	2	0	0	0	0	0	0	0	0	0	1	1	0	0	1	1	2	0	3	0	3	0	2	0	2	0
0	0	0	0	0	0	2	1	1	1	0	0	2	0	2	0	1	1	2	0	2	0	2	0	1	1	2	0	2	0	1	1	2	0	2	0	0	0	2	0	2	0	3	0	3	0	2	0	2	0
3	1	1	1	3	3	2	1	1	1	0	0	1	1	1	1	1	1	1	1	1	1	1	1	1	1	2	0	1	1	1	1	1	1	1	1	1	1	2	0	2	0	3	0	3	0	2	0	2	0
2	1	1	1	3	0	2	1	1	1	2	0	2	0	2	0	2	0	2	0	2	0	1	1	2	0	2	0	2	0	1	1	1	1	2	0	2	0	2	0	2	0	3	0	3	0	2	0	2	0
2	1	1	1	1	2	0	1	2	0	1	1	2	0	2	0	2	0	1	1	1	1	2	0	2	0	2	0	1	1	2	0	2	0	2	0	2	0	2	0	2	0	3	0	3	0	2	0	2	0
4	0	1	1	2	1	2	1	1	1	1	1	1	1	1	1	1	1	1	1	1	1	1	1	1	1	0	0	2	0	2	0	2	0	2	0	2	0	2	0	2	0	3	0	3	0	2	0	2	0
0	0	0	0	0	5	1	2	2	0	1	1	2	0	2	0	1	1	2	0	2	0	2	0	2	0	0	0	2	0	2	0	2	0	2	0	2	0	2	0	2	0	3	0	3	0	2	0	2	0
0	1	0	0	0	3	2	1	1	1	2	0	2	0	2	0	2	0	1	1	2	0	2	0	1	1	2	0	2	0	2	0	2	0	2	0	2	0	2	0	2	0	3	0	3	0	2	0	2	0
2	1	0	1	1	1	2	1	1	1	1	1	2	0	2	0	2	0	2	0	2	0	2	0	1	1	2	0	2	0	2	0	2	0	2	0	2	0	2	0	2	0	3	0	3	0	2	0	2	0
3	0	1	1	3	4	2	1	1	1	2	0	2	0	2	0	1	1	2	0	2	0	2	0	2	0	2	0	2	0	2	0	2	0	2	0	2	0	2	0	2	0	3	0	3	0	2	0	2	0
1	1	0	1	1	4	2	2	2	0	2	0	2	0	2	0	2	0	2	0	2	0	2	0	2	0	2	0	2	0	2	0	2	0	2	0	2	0	2	0	2	0	3	0	3	0	2	0	2	0
0	0	0	1	1	0	1	1	2	0	2	0	2	0	2	0	2	0	2	0	2	0	2	0	2	0	2	0	2	0	2	0	2	0	2	0	2	0	2	0	2	0	3	0	3	0	2	0	2	0
0	0	0	1	1	0	1	1	2	0	2	0	2	0	2	0	2	0	2	0	2	0	2	0	2	0	2	0	2	0	2	0	2	0	2	0	2	0	2	0	2	0	3	0	3	0	2	0	2	0
0	0	0	0	0	1	2	2	2	0	2	0	2	0	2	0	2	0	2	0	2	0	2	0	2	0	2	0	2	0	2	0	2	0	2	0	2	0	2	0	2	0	3	0	3	0	2	0	2	0
0	0	0	0	0	1	2	2	2	0	2	0	2	0	2	0	2	0	2	0	2	0	2	0	2	0	2	0	2	0	2	0	2	0	2	0	2	0	2	0	2	0	3	0	3	0	2	0	2	0
0	1	0	0	0	0	2	2	2	0	2	0	2	0	2	0	2	0	2	0	2	0	2	0	2	0	2	0	2	0	2	0	2	0	2	0	2	0	2	0	2	0	3	0	3	0	2	0	2	0
0	0	0	0	0	0	2	2	2	0	2	0	2	0	2	0	2	0	2	0	2	0	2	0	2	0	2	0	2	0	2	0	2	0	2	0	2	0	2	0	2	0	3	0	3	0	2	0	2	0
0	0	0	0	1	1	2	2	2	0	2	0	2	0	2	0	2	0	2	0	2	0	2	0	2	0	2	0	2	0	2	0	2	0	2	0	2	0	2	0	2	0	3	0	3	0	2	0	2	0
0	1	0	0	0	0	2	0	2	0	2	0	2	0	2	0	2	0	2	0	2	0	2	0	2	0	2	0	2	0	2	0	2	0	2	0	2	0	2	0	2	0	3	0	3	0	2	0	2	0
1	0	1	1	1	3	1	1	2	0	2	0	2	0	2	0	2	0	2	0	2	0	2	0	2	0	2	0	2	0	2	0	2	0	2	0	2	0	2	0	2	0	3	0	3	0	2	0	2	0
1	1	0	0	1	3	2	1	2	0	2	0	2	0	2	0	2	0	2	0	2	0	2	0	2	0	2	0	2	0	2	0	2	0	2	0	2	0	2	0	2	0	3	0	3	0	2	0	2	0
1	0	0	1	2	2	0	1	1	1	2	0	2	0	2	0	2	0	2	0	2	0	2	0	2	0	2	0	2	0	2	0	2	0	2	0	2	0	2	0	2	0	3	0	3	0	2	0	2	0
2	1	2	1	2	3	2	1	1	1	2	0	2	0	2	0	2	0	2	0	2	0	2	0	2	0	2	0	2	0	2	0	2	0	2	0	2	0	2	0	2	0	3	0	3	0	2	0	2	0
0	0	0	0	1	5	1	1	1	1	2	0	2	0	2	0	2	0	2	0	2	0	2	0	2	0	2	0	2	0	2	0	2	0	2	0	2	0	2	0	2	0	3	0	3	0	2	0	2	0
2	0	1	1	0	1	1	2	1	1	2	0	2	0	2	0	2	0	2	0	2	0	2	0	2	0	2	0	2	0	2	0	2	0	2	0	2	0	2	0	2	0	3	0	3	0	2	0	2	0
[truncated: 15 more columns]
